# Supplementary material
Source: PubMed Central journal article supplement (PMC5338455)
Supplement: pnas.1617244114.sapp.pdf [file pnas.1617244114.sapp.pdf]

## **SI materials and methods**

### **Plasmid Generation**

Original plasmids of the wild-type p110 $\alpha$ , p110 $\delta$  and p85 $\alpha$  were a kind gift from the Williams laboratory at the LMB. Immunodeficiency single substitution APDS1 mutations in p110 or the APDS2 splice variant of p85 were generated using site-directed mutagenesis according to published protocols.

### **Protein Expression and Purification**

All WT and p110 $\delta$  mutant PI3K complexes were similarly expressed as previously described (12). To express PI3K complexes, an optimised ratio of p110 $\delta$ :p85 $\alpha$  baculovirus was used to co-infect *Spodoptera frugiperda* (Sf9) cells between 1-2 $\times 10^6$  cells/mL. Co-infections were harvested between 40-72 hours and washed with ice-cold PBS before snap-freezing in liquid nitrogen. PI3K WT and APDS1 mutant proteins were purified in an identical method by lysing cells and performing nickel affinity, anion exchange, and size exclusion purifications. All steps in protein purification were carried out on ice, or in a 4°C cold room. Frozen Sf9 pellets were re-suspended in lysis buffer (20 mM Tris pH 8.0, 100 mM NaCl, 10 mM imidazole pH 8.0, 5% glycerol (v/v), 2 mM bME, protease inhibitor (Protease Inhibitor Cocktail Set III, Sigma)) and sonicated on ice for 1 minute (15s on, 15s off, level 4.0, Misonix sonicator 3000). Triton X-100 was added to the lysate at a concentration of 0.1% and centrifuged at 20,000 g for 45 minutes (Beckman Coulter Avanti J-25I, JA 25.50 rotor). The supernatant was then loaded onto a 5 mL HisTrap™ FF column (GE Healthcare) that had been equilibrated in NiNTA A buffer (20 mM Tris pH 8.0, 100 mM NaCl, 10 mM imidazole pH 8.0, 5% (v/v) glycerol, 2 mM bME). The column was washed with 20 mL of NiNTA buffer, 20 mL of 6% NiNTA B buffer (20 mM Tris pH 8.0, 100 mM NaCl, 200 mM imidazole pH 8.0, 5% (v/v) glycerol, 2 mM bME) before being eluted with 100% NiNTA B. The elution was loaded onto a 5 mL HiTrap™ Q HP column (GE Healthcare) equilibrated in Hep A buffer (20 mM Tris pH 8.0, 100 mM NaCl, 5% (v/v) glycerol, 2 mM bME). Protein was eluted using a gradient of Hep A buffer and Hep B buffer (20 mM Tris pH 8.0, 1 M NaCl, 5% (v/v) glycerol, 2 mM bME). Fractions were pooled and concentrated in a 50,000 MWCO Amicon concentrator (Millipore). Concentrated proteins were injected onto a Superdex™ 200 10/300 GL Increase size-exclusion column (GE Healthcare) equilibrated in Gel Filtration Buffer (20 mM HEPES pH 7.5, 150 mM NaCl, 0.5 mM tris(2-carboxyethyl)phosphine (TCEP)). Proteins were concentrated and frozen at a concentration between 0.5-10 mg/mL.

### **Purification of p110/p85 $\alpha$ ( $\Delta$ 434-475) APDS2 Mutants**

Complexes of p110 catalytic subunits with APDS2 mutants p85 $\alpha$  ( $\Delta$ 434-475) were highly unstable, and expressed at a much lower level than WT or APDS1 mutants. The only way to generate pure protein (>90% by SDS page analysis) was

through the use of a N-terminal streptavidin tag. Protein was unstable to concentration, and for this reason all purifications and analyses were carried out within 10 hours. Both PI3K wild-type (p110/p85 $\alpha$ ) and PI3K APDS2 mutants (p110/p85 $\alpha$   $\Delta$ 434-475) containing a N-terminal streptavidin (strep) tag (Strep-tag® II) in the p110 subunit were expressed and lysed as previously described. All steps were performed at 4°C or on ice. The supernatant was loaded onto a 1 mL StrepTrap™ HP column (GE Healthcare) equilibrated in Hep A-Deletion buffer (20 mM Tris pH 8.0 RT, 100 mM NaCl, 10% (v/v) glycerol, 2 mM  $\beta$ ME). The StrepTrap™ HP column was washed with 3 mL of Hep B-Deletion buffer (20 mM Tris pH 8.0 RT, 1 M NaCl, 10% (v/v) glycerol, 2 mM  $\beta$ ME) followed by 3 mL of HEP A-Deletion buffer. To cleave the strep-tag, 1 mL of a TEV protease solution (~0.08 mg/mL) was loaded onto the column and incubated for 3 hours. Protein was eluted using 2 mL of Hep A-Deletion buffer. The entire StrepTrap™ HP elution was loaded onto a 1 mL HiTrap™ Q HP column (GE healthcare) equilibrated in Hep A-Deletion buffer. The HiTrap™ Q HP column was washed with 3 mL of Hep A-Deletion buffer to remove the TEV protease. PI3Ks were eluted using 2 mL of HEP Elution Buffer (20 mM Tris pH 8.0 RT, 350 mM NaCl, 10% (v/v) glycerol, 2 mM  $\beta$ ME) into 100  $\mu$ L fractions. The concentration of PI3K in each fraction was determined via NanoDrop (Thermo Scientific) and corrected using band intensities following Coomassie staining on SDS-PAGE. The fractions with the highest concentrations were pooled and used for subsequent experiments.

### **Lipid Vesicle Preparation**

Two different types of lipid vesicles were made, one mimicking the composition of the plasma membrane (5% brain phosphatidylinositol 4,5- bisphosphate (PIP<sub>2</sub>), 30% brain phosphatidylserine (PS), 50% brain phosphatidylethanolamine (PE), 15% brain phosphatidylcholine (PC)) and a highly negatively charged (5% C8:PIP<sub>2</sub>, 95% brain PS) substrate, which is the optimal substrate for class IA PI3Ks. Vesicles were prepared by combining lipid components dissolved in organic solvent and evaporating the solvent under a stream of N<sub>2</sub> gas. The lipid film was desiccated under vacuum for 60 minutes. Lipids were resuspended at 1 mg/mL in lipid buffer (20 mM HEPES pH 7.5 (RT), 100 mM KCl, 0.5 mM EDTA) followed by sonication for 10 minutes. The vesicle solutions were subjected to three freeze-thaw cycles. Vesicles were extruded 11 times through a 100 nm filter using an Avanti mini-extruder (Avanti). Vesicles were snap-frozen in liquid nitrogen and stored at -80°C.

### **Lipid Kinase Assays**

Lipid kinase assays monitoring hydrolysis of ATP were carried out using the Transcreener ADP<sup>2</sup> Fluorescence Intensity (FI) assay (Bellbrook labs). Lipid vesicles were used at a final concentration of 0.45 mg/ml, with ATP present at 100  $\mu$ M. Protein solutions containing either pY (PDGFR residues 735–767, with pY740 and pY751, referred to afterwards as

pY; final concentration in assay 5  $\mu\text{M}$ ) or blank solution in 2X PI3K kinase buffer (100 mM HEPES pH 7.5, 200 mM NaCl, 6 mM  $\text{MgCl}_2$ , 2 mM EDTA, 0.06% CHAPS, 2 mM TCEP) was equilibrated briefly at 23°C. Kinase reactions were started by addition of 2  $\mu\text{L}$  of protein solution to 2  $\mu\text{L}$  of 2X substrate solution (0.9 mg/mL lipid vesicles, 200  $\mu\text{M}$  ATP) in a 384-well black microplate (Corning). The reaction was allowed to proceed at 23°C for 60 minutes before the addition of 2X Stop and Detect buffer (1X Stop and Detect Buffer, 8 nM ADP Alexa594 Tracer, 93.7  $\mu\text{g}/\text{mL}$  ADP<sup>2</sup> Antibody-IRDye QC-1). Antibody, tracer, and ADP were equilibrated for 60 minutes. Fluorescence intensity was measured using a Spectramax M5 plate reader with  $\lambda_{\text{excitation}} = 590$  nm and  $\lambda_{\text{emission}} = 620$  nm (20 nm bandwidth; Molecular Devices). Specific activity was calculated using an ATP/ADP standard curve according to the Transcreener ADP FI protocol. Fold activation shown in Fig. 1 was determined by normalising mutant specific activity values to the specific activity of the wild-type PI3K complex.

The potent PI3K inhibitor Idelalisib (SelleckChem) was used for IC<sub>50</sub> measurements. Dilutions were generated from a 1 mM master stock of Idelalisib in 100% DMSO. Inhibitor was diluted to 100  $\mu\text{M}$  in DMSO, and subsequent dilutions were all carried out in 1% final DMSO. Inhibitor dilution curves were carried out in triplicate and then mixed with substrate solution. All other lipid kinase assay steps were carried out according to the protocol described above. Values were imported into Prism (GraphPad Software, La Jolla, CA) for graphing and calculations of IC<sub>50</sub> values. Statistical analysis for differences in lipid kinase activity shown in figures were carried out using a paired student t-test.

### **Hydrogen Deuterium Exchange Mass Spectrometry (HDX-MS)**

HDX experiments were conducted in 50  $\mu\text{L}$  reactions with a final concentration of 120 nM for APDS1 mutants and WT PI3K $\delta$ . Three conditions were tested: PI3K alone, and PI3K in the presence of phosphopeptide (5  $\mu\text{M}$  pY) with and without lipid vesicles (5% PIP<sub>2</sub>, 30% PS, 50% PE, 15% PC present at 100  $\mu\text{g}/\text{mL}$ ). Deuterium exchange was initiated by the addition of 40  $\mu\text{L}$  deuterated buffer (10 mM HEPES pH 7.5, 100 mM NaCl, 98% (v/v) D<sub>2</sub>O). Exchange was carried out for three time points (3 s, 30 s, and 300 s at 23°C) and terminated by the addition of 20  $\mu\text{L}$  ice-cold quench buffer (2 M guanidine-HCl, 3% formic acid). For APDS2 experiments, 70  $\mu\text{L}$  reactions with a final concentration of 60 nM were used. Deuterium exchange was initiated by the addition of 50  $\mu\text{L}$  deuterated buffer and exchange was carried out for two time points (3s, 300s at 23°C). The reaction was terminated by the addition of 25  $\mu\text{L}$  quench buffer. All experiments were carried out in triplicate. Samples were immediately frozen in liquid nitrogen and stored at -80°C.

Protein samples were rapidly thawed and injected onto a UPLC system at 2°C. The protein was run over two immobilized pepsin columns (Applied Biosystems; porosyme, 2-3131-00) at 10°C and 2°C at 200  $\mu\text{L}/\text{min}$  for 3 minutes, and peptides were collected onto a VanGuard precolumn trap (Waters). The trap was subsequently eluted in line with an Acquity 1.7  $\mu\text{m}$  particle, 100  $\times$  1 mm<sup>2</sup> C18 UPLC column (Waters), using a gradient of 5-36% B (buffer A 0.1% formic acid, buffer B

100% acetonitrile) over 16 minutes. Mass spectrometry experiments were performed on an Impact II TOF (Bruker) acquiring over a mass range from 150 to 2200  $m/z$  using an electrospray ionization source operated at a temperature of 200°C and a spray voltage of 4.5 kV. Peptides were identified using data-dependent acquisition methods following tandem MS/MS experiments (0.5 s precursor scan from 150-2000  $m/z$ ; twelve 0.25 s fragment scans from 150-2000  $m/z$ ). MS/MS datasets were analyzed using PEAKS7 (PEAKS), and a false discovery rate was set at 1% using a database of purified proteins and known contaminants.

HD-Examiner Software (Sierra Analytics) was used to automatically calculate the level of deuterium incorporation into each peptide. All peptides were manually inspected for correct charge state and presence of overlapping peptides. Deuteration levels were calculated using the centroid of the experimental isotope clusters. Results for these proteins are presented as relative levels of deuterium incorporation and the only control for back exchange was the level of deuterium present in the buffer (78%-PI3K, 70%-Deletion). The real level of deuteration will be ~25–35% higher than shown, based on tests performed with fully deuterated standard peptides. The average error of all time points and conditions for each HDX project was less than 0.2 Da. Therefore, changes in any peptide at any time point greater than both 7% and 0.7 Da between conditions with a paired t-test value of  $p < 0.05$  was considered significant. The full deuterium incorporation for all experiments is shown in Fig. S4+S5+S6. Differences between conditions in APDS1 are shown in Fig. S7 and mapped onto a structural model in Fig. S8, and a representative example of HDX data processing is shown in Fig S2.

## Supplemental Figures

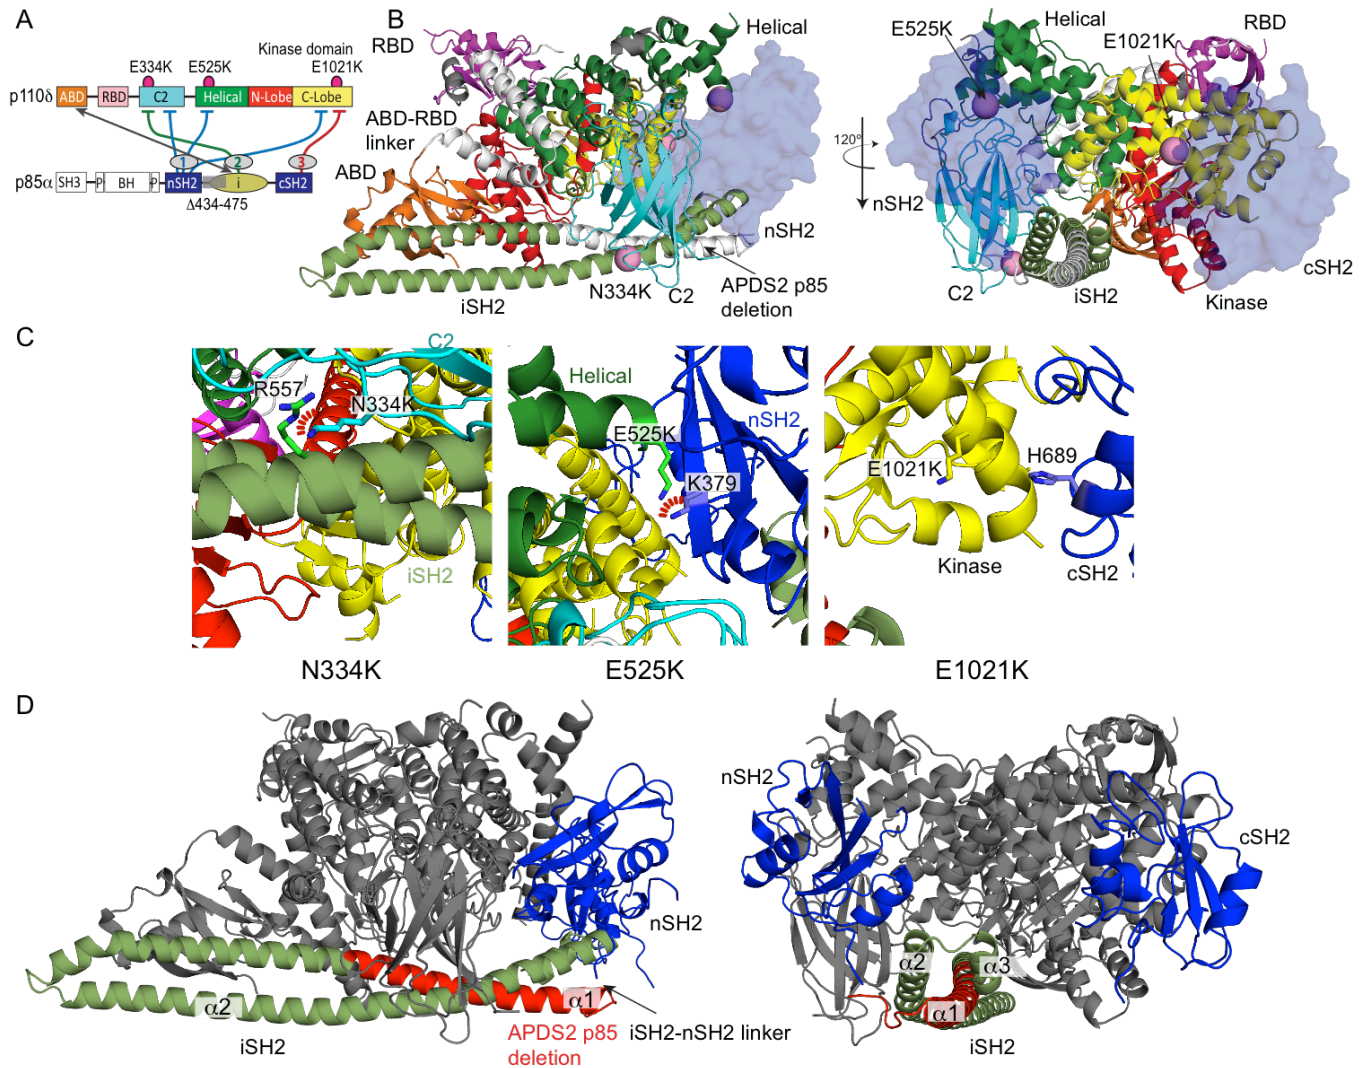

**Fig. S1. Location of APDS1 and APDS2 mutations on a structural model of the p110δ/p85α nSH2-iSH2-cSH2 model.** (A) Domain schematic of both p110δ/p85α with the binding interface between the iSH2-ABD highlighted, as well as inhibitory interfaces between the nSH2-C2/helical/kinase domains (1), iSH2-C2 domains (2), and cSH2-kinase domains indicated (3). (B) Structural model of the PI3Kδ complex based on the structure of the p110δ/p85α iSH2 structure (PDB:5DXU (37)), with the nSH2 modelled from the structure of p110α/p85α nSH2-iSH2 structure (PDB: 3HHM, (38)), and the cSH2 modelled from the structure of p110β/p85β iSH2-cSH2 (PDB:2Y3A (13)). The nSH2 and cSH2 are shown in a transparent surface representation, with APDS1 mutations studied shown as pink spheres. The APDS2 truncation in the N-terminus of the p85α iSH2 is coloured in white. (C) Highlight of the environment of APDS1 mutations. The N334K mutation is located at the C2/iSH2 domain interface, and there would be a predicted charge/charge repulsion between K334 and R557. The E525K mutation is located at the nSH2-helical domain interface, and there would be a predicted charge/charge repulsion between K525 and K379. The E1021K mutation is located in the C-terminus of the kinase domain, near the cSH2 interface in

the kinase domain. **(D)** The APDS2 p85 $\alpha$  deletion mapped onto the structural model previously described in Fig. S1.B, with SH2 domains shown in cartoon representation. The p110 $\delta$  subunit is coloured in grey, the iSH2 domain is coloured green with the three helices of the coiled coil labelled, the nSH2 and cSH2 are coloured in blue and the APDS2 p85 $\alpha$  deletion is highlighted as red.

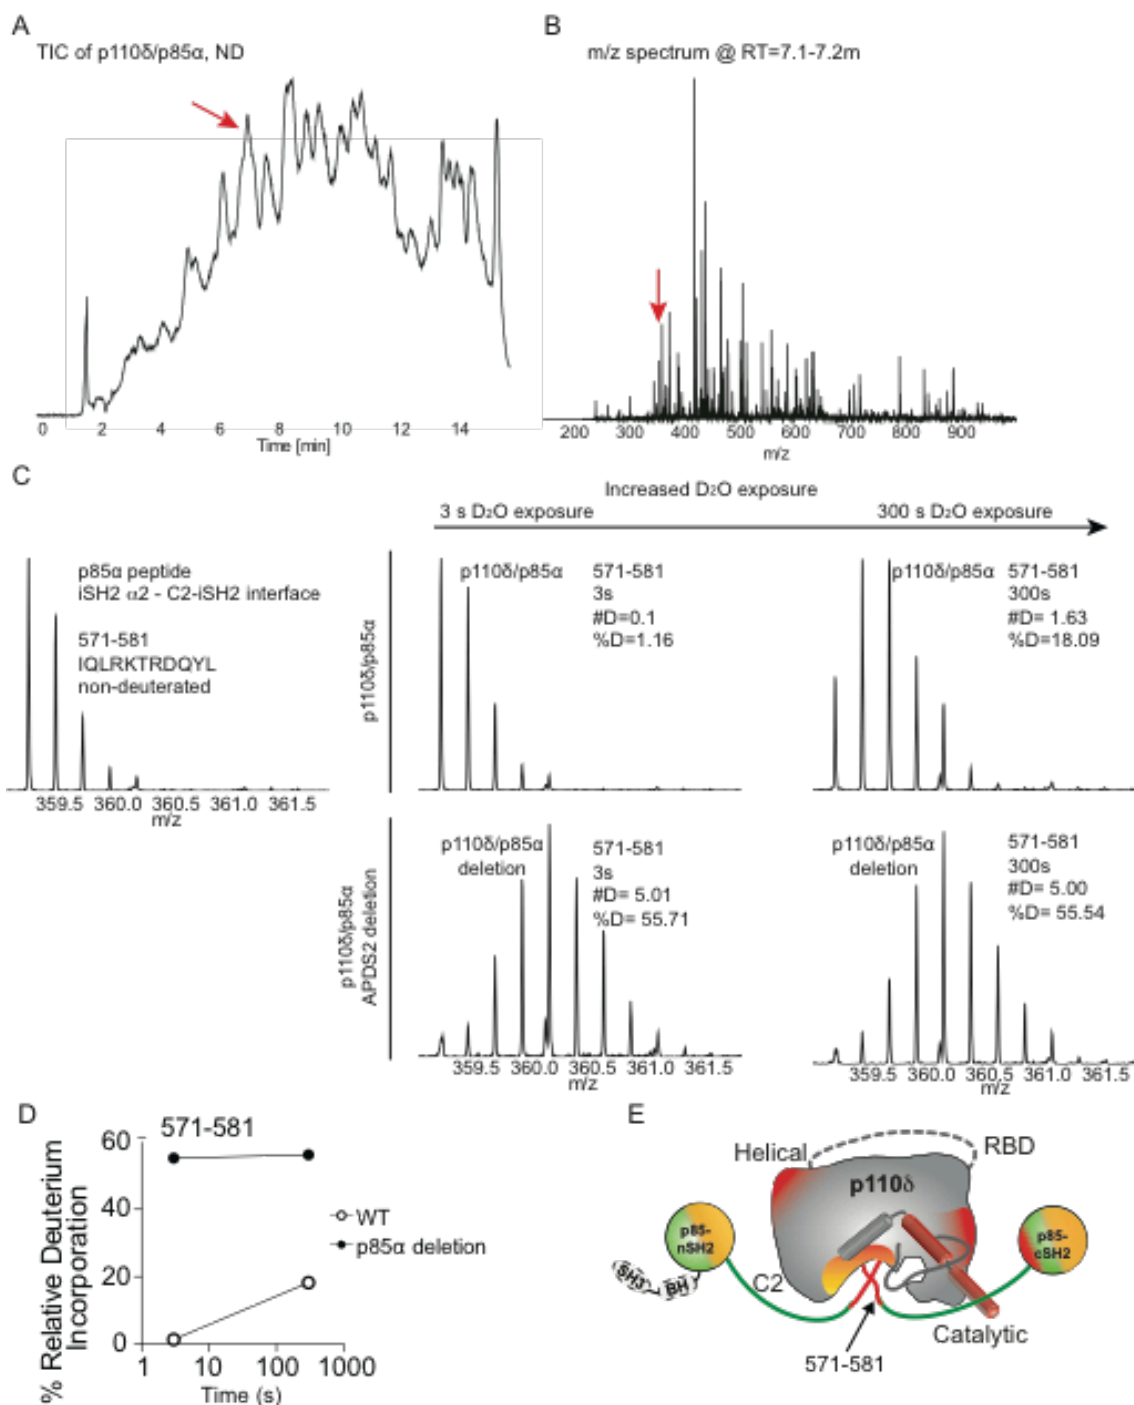

**Fig. S2. HDX-MS methodology.** (A) Representative UPLC total ion count (TIC) trace of a p110δ/p85α peptic digest. (B) MS spectra for the time window selected in the TIC in A. (C) Raw data for the peptide 571-581 in p85α showing the shift in mass centroid upon deuterium incorporation after 0 (nondeuterated, ND), 3 and 300 s exposure to D<sub>2</sub>O buffer. The difference in HDX in this peptide is highlighted for the WT and p85 APDS2 deletion constructs. (D) HDX incorporation plots for this peptide in the WT and p85 APDS2 deletion constructs. (E) Cartoon model of PI3Kδ indicating the region with increased deuterium incorporation.

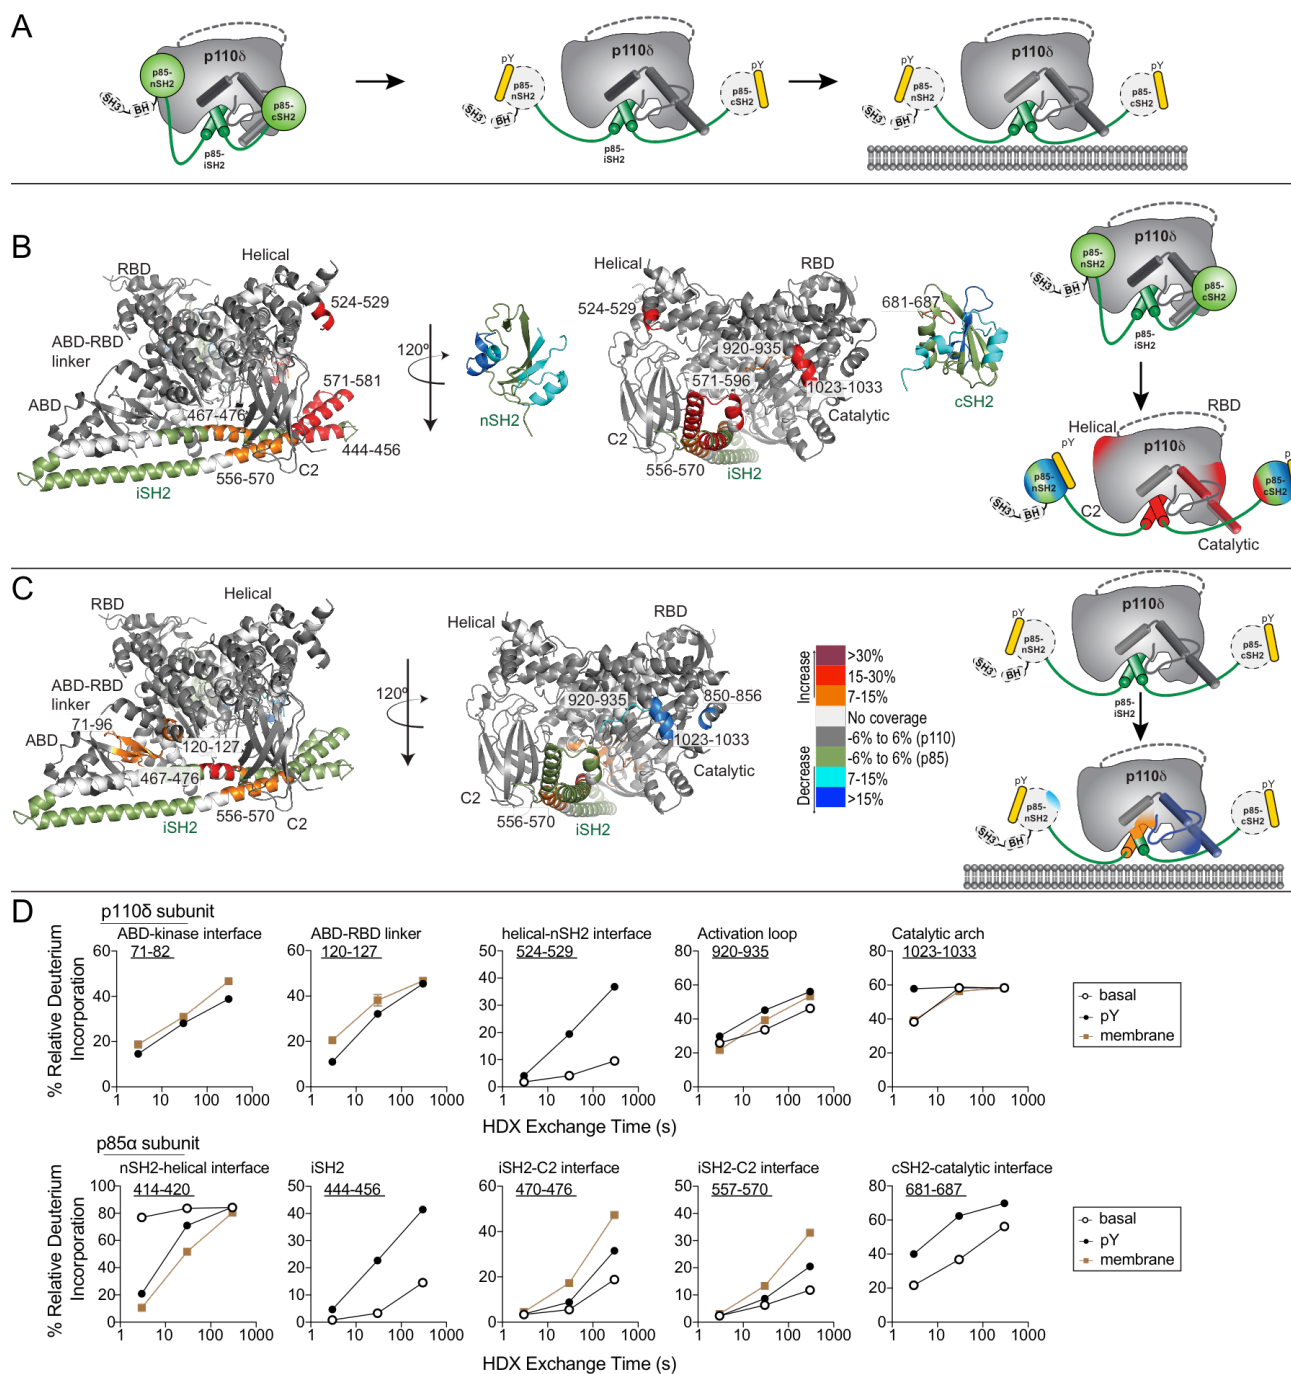

**Fig. S3. Activation cycle of PI3K $\delta$  and HDX-MS data for WT PI3K $\delta$  in presence of pY and membranes. (A)** The catalytic cycle of PI3K $\delta$  is shown in cartoon representation, with the basal cytosolic inhibited form shown on the left, the pY activated form in the centre, and the pY activated form on membranes on the right. **(B)** Peptides in p110 $\delta$  and the iSH2 of p85 $\alpha$  that showed differences in HDX both greater than 0.7 Da and 7% between the basal and pY-activated WT or **(C)** between the pY-activated WT with and without membranes, are highlighted on both the structure of p110 $\delta$  /iSH2-p85 $\alpha$  (PDB: 5DXU) and on a schematic as in panel (A). Upon pY binding to the nSH2 and cSH2 of p85 $\alpha$ , there were increases in exchange seen in the helical domain interface with the nSH2, the kinase domain interface with the cSH2, as well as the



activation loop. Upon membrane binding, the catalytic domain showed increases in exchange in the ABD domain at the interface with the kinase domain, the ABD-RBD linker, as well as regions of both the C2 and iSH2 domains at the C2/iSH2 interface. Decreases in exchange were observed in the putative membrane-binding surface in the activation loop and  $\alpha 11$  helix of the kinase domain. **(D)** Time course of deuterium incorporation for a selection of peptides in both p110 $\delta$  and p85 $\alpha$  that showed differences in HDX either upon pY or membrane addition (or both).

| p110δ |     |   |      | >30%                               | 8-15% | PI3K WT |      |     |      | PI3K deletion |      |     |      | PI3K % Relative Deuterium Incorporation |    |
|-------|-----|---|------|------------------------------------|-------|---------|------|-----|------|---------------|------|-----|------|-----------------------------------------|----|
| Start | End | Z | RT   | 15-30%                             | <8%   | 3.0     | SD   | 300 | SD   | 3.0           | SD   | 300 | SD   |                                         |    |
| 12    | 18  | 2 | 4.2  | WTKEENQ                            |       |         | 69.9 | 1.7 | 69.4 | 0.1           | 70.2 | 1.9 | 69.2 | 0.6                                     | 0  |
| 12    | 19  | 2 | 4.2  | WTKEENQS                           |       |         | 72.2 | 1.0 | 72.8 | 0.2           | 67.5 | 4.3 | 69.6 | 0.4                                     | 10 |
| 24    | 31  | 2 | 12.6 | FLLP TG VY                         |       |         | 7.2  | 0.6 | 31.2 | 0.5           | 9.7  | 0.3 | 36.2 | 0.8                                     | 20 |
| 32    | 42  | 2 | 9.6  | LNFVSRNANL                         |       |         | 31.1 | 0.7 | 38.7 | 0.2           | 36.5 | 0.1 | 46.0 | 0.2                                     | 30 |
| 35    | 42  | 2 | 5.4  | PVSRNANL                           |       |         | 44.8 | 0.6 | 55.8 | 0.1           | 49.2 | 0.9 | 60.3 | 0.4                                     | 40 |
| 43    | 59  | 4 | 11.8 | STIKQLLW HRAQYEPLF                 |       |         | 7.4  | 0.1 | 25.4 | 0.2           | 8.9  | 0.3 | 27.1 | 0.0                                     | 50 |
| 43    | 67  | 4 | 12.2 | STIKQLLW HRAQYEPLFHMLSGPEA         |       |         | 20.1 | 0.6 | 36.6 | 0.4           | 22.2 | 0.3 | 39.3 | 0.4                                     | 60 |
| 48    | 59  | 3 | 11.9 | LLW HRAQYEPLF                      |       |         | 11.4 | 0.3 | 34.1 | 0.4           | 13.8 | 0.3 | 34.9 | 0.5                                     | 70 |
| 60    | 67  | 2 | 6.3  | HMLSGPEA                           |       |         | 49.0 | 0.4 | 68.0 | 0.6           | 49.5 | 0.6 | 67.6 | 0.4                                     | 80 |
| 71    | 82  | 2 | 8.2  | TCINQTAEGQEL                       |       |         | 25.2 | 0.5 | 51.0 | 0.7           | 34.3 | 1.2 | 72.7 | 0.2                                     | 90 |
| 71    | 96  | 3 | 12.6 | TCINQTAEGQELDEQRRLCDVQPFL          |       |         | 29.9 | 0.5 | 61.9 | 0.1           | 34.4 | 0.4 | 73.2 | 0.3                                     |    |
| 83    | 96  | 3 | 11.3 | EDEQRRLCDVQPFL                     |       |         | 15.2 | 0.6 | 52.1 | 0.4           | 20.4 | 0.8 | 58.3 | 0.2                                     |    |
| 102   | 116 | 4 | 6.2  | VAREGDRVKKLINSQ                    |       |         | 59.6 | 0.2 | 63.2 | 0.7           | 59.0 | 0.6 | 62.4 | 0.2                                     |    |
| 102   | 120 | 3 | 10.4 | VAREGDRVKKLINSQISLL                |       |         | 37.9 | 0.2 | 48.3 | 0.2           | 39.8 | 0.2 | 58.2 | 0.4                                     |    |
| 120   | 127 | 3 | 5.7  | LIGKGLHE                           |       |         | 17.1 | 0.9 | 50.0 | 1.9           | 40.9 | 0.6 | 54.7 | 0.1                                     |    |
| 121   | 127 | 2 | 4.3  | IGKGLHE                            |       |         | 20.5 | 1.3 | 53.1 | 0.7           | 43.4 | 1.1 | 50.0 | 0.9                                     |    |
| 121   | 131 | 3 | 9.7  | IGKGLHEFDSL                        |       |         | 20.1 | 0.5 | 31.2 | 0.7           | 29.8 | 0.6 | 31.7 | 0.1                                     |    |
| 150   | 162 | 3 | 11.3 | AAARRQQLGWEAW                      |       |         | 24.4 | 0.6 | 61.6 | 0.3           | 30.2 | 0.2 | 64.8 | 1.0                                     |    |
| 163   | 190 | 3 | 13.2 | LQYSFPLQLEPSAQTWGPGLRLLPNRAL       |       |         | 53.9 | 0.3 | 70.6 | 0.4           | 56.3 | 0.4 | 75.0 | 0.2                                     |    |
| 164   | 175 | 3 | 12.3 | QYSFPLQLEPSA                       |       |         | 15.1 | 0.1 | 25.2 | 0.1           | 17.6 | 0.5 | 30.8 | 0.3                                     |    |
| 168   | 191 | 3 | 12.2 | PLQLEPSAQTWGPGLRLLPNRALL           |       |         | 62.4 | 0.7 | 76.4 | 0.2           | 64.1 | 1.0 | 77.9 | 0.1                                     |    |
| 183   | 191 | 3 | 9.5  | LRLPNRALL                          |       |         | 60.1 | 0.5 | 82.8 | 0.4           | 55.4 | 2.2 | 80.1 | 1.5                                     |    |
| 192   | 200 | 1 | 7.0  | VNVKFE GSE                         |       |         | 32.5 | 0.2 | 44.2 | 0.1           | 35.9 | 1.3 | 48.6 | 0.8                                     |    |
| 203   | 216 | 3 | 12.4 | FTFQVSTKDVPLAL                     |       |         | 24.4 | 0.7 | 41.0 | 0.4           | 24.6 | 1.4 | 47.1 | 1.9                                     |    |
| 205   | 216 | 2 | 11.1 | FQVSTKDVPLAL                       |       |         | 19.9 | 0.6 | 40.0 | 0.2           | 20.5 | 0.8 | 45.6 | 0.5                                     |    |
| 206   | 216 | 2 | 9.8  | QVSTKDVPLAL                        |       |         | 20.6 | 0.9 | 42.6 | 0.1           | 22.8 | 0.9 | 49.3 | 0.7                                     |    |
| 221   | 238 | 4 | 6.9  | LRKATVFRQPLVEQPED                  |       |         | 55.8 | 0.4 | 66.7 | 0.3           | 54.9 | 0.4 | 65.5 | 1.5                                     |    |
| 228   | 238 | 2 | 7.7  | FRQPLVEQPED                        |       |         | 60.9 | 0.2 | 78.7 | 0.5           | 56.5 | 1.8 | 73.6 | 3.1                                     |    |
| 239   | 250 | 3 | 9.1  | YTLQVNGRHEYL                       |       |         | 5.5  | 0.2 | 10.2 | 0.1           | 7.1  | 0.3 | 17.8 | 0.1                                     |    |
| 251   | 258 | 1 | 9.6  | YGSYPLCQ                           |       |         | 11.0 | 1.1 | 14.0 | 0.8           | 16.9 | 2.1 | 28.9 | 0.3                                     |    |
| 251   | 259 | 2 | 12.9 | YGSYPLCQF                          |       |         | 6.6  | 0.2 | 7.6  | 0.1           | 8.3  | 0.4 | 13.0 | 0.2                                     |    |
| 265   | 274 | 3 | 8.2  | CLHSGLTPHL                         |       |         | 13.8 | 0.2 | 25.0 | 0.0           | 14.6 | 0.2 | 27.1 | 0.2                                     |    |
| 267   | 283 | 4 | 9.4  | HSGLTPHLTMVHSSSIL                  |       |         | 3.3  | 0.3 | 8.7  | 0.0           | 6.5  | 0.7 | 15.2 | 2.0                                     |    |
| 275   | 283 | 2 | 8.5  | TMVHSSSIL                          |       |         | 3.6  | 0.2 | 16.9 | 0.1           | 8.5  | 0.5 | 29.0 | 0.0                                     |    |
| 284   | 313 | 5 | 5.0  | AMRDEQSNPAPQVQKPRAKPPPPIPAKPKSS    |       |         | 70.8 | 0.3 | 73.3 | 0.4           | 70.7 | 1.6 | 72.6 | 0.0                                     |    |
| 284   | 316 | 5 | 6.3  | AMRDEQSNPAPQVQKPRAKPPPPIPAKPKSSVSL |       |         | 65.1 | 0.2 | 66.9 | 0.1           | 64.9 | 1.0 | 66.5 | 0.2                                     |    |
| 317   | 327 | 2 | 13.9 | WSLEQPFRIEL                        |       |         | 12.6 | 0.1 | 24.3 | 0.1           | 14.8 | 0.1 | 28.0 | 0.2                                     |    |
| 328   | 337 | 2 | 4.2  | IQGSKVNADE                         |       |         | 26.9 | 0.6 | 51.9 | 0.2           | 38.3 | 0.7 | 60.5 | 0.6                                     |    |
| 328   | 341 | 4 | 6.9  | IQGSKVNADERMKL                     |       |         | 18.7 | 0.4 | 34.5 | 0.1           | 26.8 | 1.0 | 44.0 | 0.2                                     |    |
| 342   | 347 | 1 | 7.1  | VVQAGL                             |       |         | 3.7  | 0.7 | 4.2  | 0.7           | 6.7  | 1.3 | 6.3  | 0.1                                     |    |
| 342   | 353 | 2 | 9.7  | VVQAGL FHGNEM                      |       |         | 12.1 | 0.7 | 20.7 | 0.1           | 15.7 | 0.5 | 21.3 | 1.0                                     |    |
| 348   | 354 | 2 | 8.6  | FHGNEML                            |       |         | 18.2 | 0.1 | 31.3 | 0.0           | 23.7 | 1.3 | 28.1 | 0.7                                     |    |
| 355   | 362 | 2 | 3.5  | CKTVSSSE                           |       |         | 39.7 | 0.9 | 53.7 | 0.0           | 40.1 | 0.7 | 57.7 | 1.3                                     |    |
| 366   | 377 | 3 | 10.9 | CSEPVWKQRLEF                       |       |         | 19.7 | 0.5 | 43.8 | 0.0           | 20.3 | 0.1 | 48.2 | 0.2                                     |    |
| 369   | 377 | 3 | 10.3 | PVWKQRLEF                          |       |         | 19.3 | 0.4 | 36.6 | 0.5           | 21.2 | 1.2 | 42.9 | 0.3                                     |    |
| 378   | 384 | 2 | 12.5 | DINICDL                            |       |         | 1.1  | 0.3 | 4.6  | 0.0           | 3.4  | 1.4 | 7.3  | 1.2                                     |    |
| 381   | 387 | 2 | 9.9  | ICDLPRM                            |       |         | -2.4 | 0.2 | 16.7 | 0.5           | 2.2  | 2.0 | 18.6 | 0.4                                     |    |
| 388   | 392 | 2 | 9.7  | ARLCF                              |       |         | 1.7  | 0.3 | 2.4  | 0.9           | 1.6  | 2.5 | 5.4  | 1.6                                     |    |
| 426   | 439 | 4 | 9.1  | FDYKDKLTKGERCL                     |       |         | 20.8 | 0.1 | 35.5 | 0.2           | 23.8 | 1.1 | 39.8 | 0.8                                     |    |
| 439   | 452 | 2 | 12.5 | LYMWPSVPDEKGEL                     |       |         | 36.8 | 0.4 | 43.8 | 0.4           | 38.4 | 0.4 | 44.4 | 0.2                                     |    |
| 440   | 452 | 2 | 11.7 | YMWPSVPDEKGEL                      |       |         | 42.6 | 0.7 | 50.8 | 0.1           | 43.6 | 0.7 | 51.0 | 0.4                                     |    |
| 440   | 468 | 3 | 11.0 | YMWPSVPDEKCELLNPTGTVRSNPNTDSA      |       |         | 37.7 | 0.5 | 56.0 | 0.4           | 40.1 | 0.2 | 59.5 | 0.3                                     |    |
| 453   | 468 | 2 | 5.6  | LNPTGTVRSNPNTDSA                   |       |         | 51.5 | 0.7 | 79.1 | 0.2           | 55.7 | 0.8 | 80.6 | 0.6                                     |    |
| 476   | 488 | 2 | 10.6 | PEVAPHVYYPAL                       |       |         | 34.9 | 0.6 | 64.0 | 0.2           | 39.0 | 1.0 | 65.6 | 0.4                                     |    |
| 501   | 508 | 2 | 4.4  | VHVTEEEQ                           |       |         | 42.1 | 1.1 | 66.0 | 2.1           | 51.1 | 0.8 | 66.7 | 1.6                                     |    |
| 515   | 522 | 2 | 4.3  | LERRGSGE                           |       |         | 58.5 | 0.7 | 58.6 | 0.3           | 56.6 | 1.4 | 57.4 | 0.1                                     |    |
| 516   | 523 | 2 | 4.3  | ERRGSDEL                           |       |         | 58.5 | 0.7 | 58.6 | 0.3           | 56.6 | 1.4 | 57.4 | 0.1                                     |    |
| 524   | 529 | 2 | 3.2  | YEHEKD                             |       |         | 5.6  | 0.5 | 18.3 | 2.3           | 15.7 | 2.5 | 37.2 | 0.5                                     |    |
| 524   | 546 | 5 | 11.5 | YEHEKDLVWKL RHEVQEHPPEAL           |       |         | 3.6  | 0.2 | 9.7  | 0.4           | 4.3  | 0.1 | 14.0 | 0.0                                     |    |
| 550   | 564 | 4 | 8.5  | LLVTKWNKHEDVAQM                    |       |         | 2.1  | 0.0 | 7.4  | 0.3           | 2.3  | 0.4 | 9.8  | 0.4                                     |    |
| 568   | 574 | 2 | 13.3 | LCSWPEL                            |       |         | 19.4 | 1.0 | 59.8 | 1.9           | 25.5 | 0.6 | 62.9 | 0.4                                     |    |
| 583   | 587 | 1 | 12.9 | LDFS F                             |       |         | 26.6 | 0.6 | 58.8 | 0.6           | 36.5 | 0.2 | 63.4 | 0.9                                     |    |
| 583   | 595 | 2 | 13.3 | LDFSFPDCHVG SF                     |       |         | 12.7 | 0.3 | 38.7 | 0.0           | 15.3 | 0.3 | 36.5 | 1.1                                     |    |
| 585   | 595 | 2 | 12.4 | FSFPDCHVG SF                       |       |         | 6.3  | 0.3 | 30.8 | 0.1           | 7.4  | 0.6 | 29.5 | 0.7                                     |    |
| 596   | 608 | 2 | 8.4  | AIKSLRKLTDDEL                      |       |         | 11.2 | 0.3 | 22.1 | 0.5           | 12.2 | 0.3 | 24.4 | 0.2                                     |    |
| 616   | 625 | 2 | 11.0 | VQVLKYESYL                         |       |         | 18.2 | 0.6 | 33.0 | 0.0           | 21.6 | 0.2 | 40.2 | 0.8                                     |    |
| 628   | 634 | 2 | 11.0 | ELTKFLL                            |       |         | 0.6  | 1.0 | 2.1  | 1.0           | 1.1  | 0.3 | 2.4  | 2.0                                     |    |
| 633   | 647 | 4 | 9.2  | LLDRALANRKIGHFL                    |       |         | 1.4  | 0.2 | 4.1  | 0.0           | 3.3  | 0.2 | 10.3 | 0.2                                     |    |

**Fig. S4. All HDX peptide data for experiments examining conformational changes in APDS2 mutation (labelled as p85 deletion) for both p110δ and p85α.** The charge state (Z), residue start, residue end number, retention time (RT) and sequence are displayed for every peptide. The two time points are labelled for the conditions tested. The relative level of HDX is coloured according to the amount of deuterium incorporated, on a blue to red continuum. Peptides with differences in exchange have the sequence colour according to the legend. The data listed are the average of three independent experiments, with SD shown next to all HDX values.

| p110 $\delta$ |      |   |      |                       | PI3K WT |     |      |     | PI3K deletion |     |      |     |
|---------------|------|---|------|-----------------------|---------|-----|------|-----|---------------|-----|------|-----|
| Start         | End  | Z | RT   | Sequence              | 3.0     | SD  | 300  | SD  | 3.0           | SD  | 300  | SD  |
| 634           | 647  | 4 | 8.0  | LDALANRKIGHFL         | 2.6     | 0.1 | 7.5  | 0.3 | 5.1           | 1.0 | 17.3 | 0.2 |
| 635           | 646  | 4 | 6.4  | DRALANRKIGHF          | 3.7     | 0.4 | 9.8  | 0.3 | 6.8           | 0.8 | 21.0 | 0.1 |
| 636           | 646  | 4 | 5.6  | RALANRKIGHF           | 3.8     | 0.8 | 10.3 | 0.9 | 6.6           | 1.8 | 21.8 | 2.5 |
| 647           | 651  | 2 | 13.0 | LFWHL                 | 0.3     | 0.4 | 1.1  | 0.6 | 2.9           | 0.6 | 9.6  | 0.2 |
| 648           | 655  | 3 | 10.1 | FWHLRSEM              | 1.2     | 0.5 | 1.5  | 0.3 | 4.7           | 0.3 | 7.7  | 0.9 |
| 662           | 668  | 2 | 13.3 | LRFGIL                | 1.3     | 0.3 | 1.8  | 0.1 | 3.6           | 0.2 | 10.5 | 0.2 |
| 683           | 689  | 2 | 5.9  | MKQGEAL               | 1.9     | 0.8 | 4.5  | 0.2 | 11.0          | 1.2 | 23.9 | 4.9 |
| 698           | 713  | 5 | 5.0  | FVKLSSQKTPKPQTKE      | 39.2    | 0.7 | 58.1 | 0.6 | 42.9          | 1.1 | 60.1 | 0.3 |
| 698           | 715  | 4 | 6.9  | FVKLSSQKTPKPQKELM     | 28.6    | 0.6 | 46.8 | 0.0 | 32.3          | 0.3 | 50.5 | 1.0 |
| 726           | 740  | 2 | 10.6 | EALSHLQSPDPSTL        | 7.6     | 0.5 | 27.0 | 0.5 | 12.6          | 0.8 | 35.6 | 0.3 |
| 726           | 741  | 2 | 12.1 | EALSHLQSPDPSTLL       | 5.9     | 0.3 | 24.1 | 0.5 | 11.7          | 1.8 | 33.9 | 0.6 |
| 728           | 740  | 2 | 10.2 | LSHLQSPDPSTL          | 8.4     | 0.5 | 31.3 | 0.2 | 15.7          | 0.0 | 42.1 | 0.4 |
| 746           | 751  | 1 | 9.0  | VEQCTF                | 4.9     | 0.4 | 37.1 | 0.1 | 9.2           | 1.7 | 47.0 | 2.3 |
| 752           | 760  | 3 | 10.3 | MDSKMKPLW             | 22.1    | 0.5 | 34.7 | 0.3 | 24.3          | 0.3 | 39.4 | 0.4 |
| 752           | 762  | 3 | 12.3 | MDSKMKPLWIM           | 13.3    | 0.4 | 22.6 | 0.0 | 16.4          | 0.1 | 28.6 | 0.2 |
| 753           | 760  | 3 | 10.2 | DSKMKPLW              | 23.3    | 0.5 | 38.4 | 0.8 | 32.8          | 0.9 | 46.3 | 0.2 |
| 753           | 762  | 3 | 12.4 | DSKMKPLWIM            | 12.8    | 0.4 | 23.3 | 0.3 | 15.3          | 0.3 | 32.0 | 0.8 |
| 767           | 775  | 1 | 3.7  | EAGSGGSVG             | 45.0    | 1.1 | 56.5 | 0.2 | 45.5          | 2.0 | 56.2 | 1.5 |
| 776           | 784  | 2 | 9.4  | IIFKNGDDL             | 19.5    | 0.4 | 28.7 | 0.2 | 21.6          | 0.3 | 33.3 | 0.6 |
| 801           | 807  | 2 | 7.2  | WKQEGLD               | 4.5     | 0.4 | 27.0 | 0.7 | 9.6           | 0.6 | 33.9 | 0.1 |
| 808           | 826  | 3 | 10.7 | LRMTPYGCLPTGDRTGLIE   | 5.2     | 0.4 | 13.3 | 0.2 | 8.4           | 0.1 | 22.2 | 0.0 |
| 809           | 824  | 3 | 9.7  | RMTPTYGCLPTGDRTGL     | 5.5     | 0.6 | 16.4 | 0.2 | 11.6          | 2.3 | 30.4 | 1.5 |
| 827           | 836  | 2 | 6.5  | VVLRSDTIAN            | 23.7    | 0.2 | 41.6 | 0.0 | 27.8          | 0.5 | 55.2 | 1.6 |
| 830           | 836  | 2 | 3.8  | RSDTIAN               | 0.6     | 0.2 | 15.8 | 0.5 | 9.5           | 1.4 | 44.4 | 1.1 |
| 850           | 856  | 2 | 9.4  | FNKDALL               | 57.5    | 5.7 | 69.7 | 0.5 | 61.7          | 1.8 | 73.4 | 1.7 |
| 851           | 856  | 2 | 7.6  | NKDALL                | 46.4    | 0.5 | 65.4 | 0.1 | 46.5          | 1.4 | 67.7 | 0.8 |
| 856           | 868  | 3 | 9.8  | LNWLKSKNPGEAL         | 35.1    | 0.3 | 49.4 | 0.0 | 37.7          | 0.4 | 51.3 | 0.1 |
| 857           | 868  | 3 | 9.0  | NWLKSKNPGEAL          | 38.5    | 0.3 | 49.5 | 0.4 | 40.3          | 0.1 | 51.7 | 0.2 |
| 869           | 874  | 2 | 4.5  | DRAIEE                | 2.3     | 0.4 | 6.5  | 0.2 | 7.0           | 0.8 | 14.8 | 1.4 |
| 875           | 881  | 1 | 9.6  | FTLSCAG               | -1.7    | 0.3 | -1.3 | 0.1 | 1.9           | 0.6 | 3.0  | 0.6 |
| 882           | 886  | 1 | 6.4  | YCVAT                 | -0.6    | 0.0 | -0.1 | 0.3 | 1.9           | 0.8 | 2.6  | 0.3 |
| 887           | 898  | 3 | 7.9  | YVLGIGDRHSDN          | 6.5     | 0.4 | 15.9 | 0.1 | 13.2          | 2.6 | 24.8 | 0.2 |
| 887           | 900  | 2 | 10.0 | YVLGIGDRHSDNIM        | 3.0     | 0.2 | 9.2  | 0.2 | 7.4           | 0.2 | 16.3 | 0.1 |
| 901           | 907  | 2 | 5.8  | IRESGQL               | 6.1     | 0.2 | 26.8 | 0.3 | 11.8          | 0.3 | 33.3 | 0.4 |
| 908           | 912  | 2 | 11.5 | FHIDF                 | 1.9     | 0.4 | 17.8 | 1.6 | 6.5           | 3.2 | 32.5 | 0.6 |
| 908           | 915  | 3 | 11.8 | FHIDFGHF              | 13.1    | 0.9 | 28.7 | 0.6 | 18.9          | 0.2 | 34.1 | 0.2 |
| 908           | 919  | 3 | 13.8 | FHIDFGHFLGNF          | 25.5    | 0.7 | 43.5 | 0.1 | 33.8          | 0.3 | 44.9 | 0.8 |
| 909           | 919  | 3 | 12.8 | HIDFGHFLGNF           | 29.5    | 1.0 | 47.9 | 0.3 | 36.9          | 1.2 | 47.1 | 0.6 |
| 920           | 934  | 4 | 10.2 | KTKFGINRERVPFIL       | 30.7    | 0.6 | 46.9 | 0.1 | 35.0          | 0.8 | 53.4 | 0.7 |
| 920           | 935  | 4 | 9.8  | KTKFGINRERVPFILT      | 31.9    | 0.5 | 53.9 | 0.3 | 40.4          | 0.3 | 60.5 | 0.1 |
| 939           | 958  | 5 | 6.3  | VHVIQQGKTNNSEKFERFRG  | 20.0    | 0.4 | 30.5 | 0.2 | 24.3          | 0.4 | 33.6 | 0.4 |
| 964           | 973  | 3 | 8.5  | YTILRRHGLL            | 8.2     | 0.0 | 17.1 | 0.4 | 9.0           | 0.5 | 20.2 | 1.3 |
| 964           | 973  | 4 | 8.5  | YTILRRHGLL            | 9.8     | 0.8 | 17.8 | 0.4 | 8.6           | 1.0 | 19.8 | 2.0 |
| 964           | 974  | 4 | 10.6 | YTILRRHGLLF           | 6.9     | 0.3 | 15.7 | 0.3 | 7.5           | 0.2 | 18.9 | 0.6 |
| 978           | 989  | 2 | 12.5 | FALMRAAGLPEL          | 22.1    | 0.5 | 59.8 | 0.2 | 32.4          | 1.9 | 62.4 | 0.2 |
| 982           | 989  | 2 | 9.5  | RAAGLPEL              | 32.8    | 1.0 | 80.3 | 0.6 | 48.7          | 1.3 | 82.1 | 0.3 |
| 1010          | 1019 | 3 | 8.0  | EALKHFRVKF            | 0.5     | 0.1 | 10.8 | 0.2 | 2.9           | 0.3 | 21.5 | 1.4 |
| 1024          | 1033 | 4 | 8.5  | RESWTKVNVV            | 50.8    | 0.7 | 61.4 | 0.7 | 61.0          | 1.6 | 61.5 | 0.4 |
| 1024          | 1044 | 5 | 8.2  | RESWTKVNVWLAHNVSKDNRQ | 48.7    | 1.0 | 54.4 | 1.2 | 52.9          | 0.9 | 53.2 | 0.5 |
| 1034          | 1044 | 3 | 3.3  | LAHNVSKDNRQ           | 55.2    | 1.2 | 55.4 | 0.0 | 53.3          | 0.8 | 54.6 | 0.6 |

Fig. S4 All HDX peptide data for experiments examining conformational changes in APDS2 mutation (labelled as PI3K deletion) for both p110 $\delta$  and p85 $\alpha$  (cont).

| p85α<br>S | E   | Z | RT   | Sequence                          | PI3K WT        |              | PI3K deletion |     |       |     |      |     |       |
|-----------|-----|---|------|-----------------------------------|----------------|--------------|---------------|-----|-------|-----|------|-----|-------|
|           |     |   |      |                                   | >30%<br>15-30% | 8-15%<br><8% | 3.0           | SD  | 300.0 | SD  | 3.0  | SD  | 300.0 |
| 8         | 13  | 2 | 7.7  | YRALYD                            | 6.1            | 1.0          | 19.4          | 0.6 | 5.6   | 0.6 | 19.2 | 0.6 | 0     |
| 14        | 21  | 3 | 3.0  | YKKEEED                           | 29.7           | 2.9          | 36.8          | 3.6 | 23.9  | 2.9 | 32.9 | 4.0 | 10    |
| 22        | 30  | 2 | 12.7 | IDLHLGDIL                         | 4.5            | 0.3          | 14.9          | 0.6 | 4.8   | 0.3 | 15.7 | 0.7 | 20    |
| 38        | 52  | 2 | 8.7  | VALGFSDGQEARPEE                   | 52.4           | 0.8          | 65.9          | 0.3 | 50.9  | 0.1 | 65.5 | 0.8 | 30    |
| 53        | 60  | 1 | 11.9 | IGWLNQYN                          | 16.0           | 0.8          | 27.6          | 0.2 | 16.6  | 1.0 | 28.1 | 0.5 | 40    |
| 59        | 72  | 2 | 7.8  | YNETTGERGDFPGT                    | 13.3           | 0.3          | 30.4          | 1.0 | 12.6  | 0.8 | 30.2 | 1.0 | 50    |
| 73        | 106 | 5 | 6.5  | YVEYIGRKKISPTPKPRPPRPLVPAGSSKTEA  | 56.3           | 0.1          | 59.8          | 0.0 | 56.4  | 0.7 | 60.2 | 0.3 | 60    |
| 77        | 106 | 5 | 5.4  | IGRKKISPTPKPRPPRPLVPAGSSKTEA      | 65.2           | 0.5          | 65.1          | 0.3 | 64.7  | 0.9 | 64.8 | 0.5 | 70    |
| 77        | 107 | 5 | 5.4  | IGRKKISPTPKPRPPRPLVPAGSSKTEAD     | 65.7           | 0.6          | 65.8          | 0.2 | 64.8  | 0.9 | 64.1 | 0.1 | 80    |
| 113       | 118 | 1 | 12.0 | LTLPLD                            | 41.4           | 1.1          | 77.4          | 0.2 | 40.6  | 1.6 | 75.9 | 0.0 | 90    |
| 119       | 132 | 2 | 12.7 | AEQFAPPDIAPPLL                    | 19.8           | 0.5          | 38.6          | 0.4 | 19.5  | 0.4 | 38.5 | 0.1 |       |
| 122       | 132 | 2 | 12.7 | FAPPDIAPPLL                       | 20.1           | 0.5          | 41.4          | 1.3 | 22.8  | 0.3 | 44.7 | 1.7 |       |
| 133       | 138 | 2 | 7.4  | IKLVEA                            | 2.0            | 0.2          | 2.2           | 0.3 | 2.7   | 0.7 | 3.0  | 0.0 |       |
| 139       | 146 | 3 | 5.0  | IEKKGLEC                          | 22.7           | 0.2          | 58.8          | 0.5 | 27.6  | 0.4 | 60.7 | 1.2 |       |
| 149       | 158 | 2 | 6.4  | LYRTQSSSNL                        | 58.5           | 0.5          | 66.8          | 0.1 | 61.2  | 0.3 | 69.9 | 1.0 |       |
| 168       | 173 | 1 | 4.8  | DTPSVD                            | 81.7           | 0.5          | 81.8          | 0.4 | 81.4  | 1.6 | 81.3 | 0.0 |       |
| 177       | 185 | 2 | 9.3  | IDVHVLADA                         | 11.5           | 0.3          | 15.0          | 0.1 | 11.7  | 0.3 | 15.4 | 0.3 |       |
| 177       | 186 | 2 | 12.0 | IDVHVLADAF                        | 8.1            | 0.4          | 11.7          | 0.2 | 9.1   | 0.3 | 13.4 | 0.3 |       |
| 186       | 202 | 3 | 12.0 | FKRYLLDLPNPVIPAAV                 | 13.2           | 0.0          | 18.6          | 0.5 | 12.9  | 0.2 | 18.5 | 0.1 |       |
| 186       | 203 | 3 | 12.4 | FKRYLLDLPNPVIPAAY                 | 12.1           | 0.2          | 18.2          | 0.3 | 11.8  | 0.4 | 18.1 | 0.1 |       |
| 207       | 218 | 1 | 8.7  | ISLAPEVQSSEE                      | 68.7           | 0.8          | 74.1          | 0.1 | 65.0  | 3.2 | 71.2 | 4.9 |       |
| 207       | 218 | 2 | 8.7  | ISLAPEVQSSEE                      | 68.5           | 0.9          | 74.0          | 0.1 | 66.2  | 0.4 | 70.6 | 0.0 |       |
| 220       | 237 | 4 | 10.4 | IQLLKKLIRSPSIPHQYW                | 7.8            | 0.6          | 30.3          | 0.4 | 7.7   | 0.2 | 33.1 | 1.1 |       |
| 223       | 237 | 3 | 8.8  | LKLLIRSPSIPHQYW                   | 8.0            | 0.1          | 21.6          | 0.1 | 8.3   | 0.3 | 21.7 | 0.3 |       |
| 238       | 261 | 4 | 13.6 | LTLQYLLKHFHFKLSQTSSKLLNA          | 13.0           | 0.0          | 22.2          | 0.3 | 13.1  | 0.2 | 22.3 | 0.6 |       |
| 242       | 261 | 3 | 10.4 | YLLKHFFKLSQTSSKLLNA               | 16.5           | 0.3          | 27.7          | 0.6 | 17.6  | 0.6 | 28.7 | 1.1 |       |
| 262       | 266 | 1 | 4.7  | RVLSE                             | 2.1            | 0.8          | 3.4           | 0.6 | 3.4   | 1.1 | 5.6  | 2.0 |       |
| 262       | 268 | 2 | 11.0 | RVLSEIF                           | 0.8            | 0.9          | 2.1           | 1.3 | 1.7   | 0.4 | 2.2  | 1.6 |       |
| 262       | 272 | 2 | 13.1 | RVLSEIFSPML                       | 1.3            | 0.2          | 10.9          | 0.0 | 1.4   | 0.1 | 10.7 | 0.1 |       |
| 267       | 272 | 1 | 12.2 | IFSPML                            | 0.0            | 0.2          | 28.5          | 0.2 | 3.5   | 1.2 | 31.7 | 0.9 |       |
| 273       | 286 | 2 | 9.5  | FRFSAASSDNTENL                    | 50.4           | 0.9          | 61.0          | 0.2 | 50.5  | 0.6 | 61.4 | 1.1 |       |
| 287       | 291 | 2 | 7.1  | IKVIE                             | 0.7            | 0.8          | 0.8           | 0.7 | 1.9   | 1.1 | 4.5  | 0.3 |       |
| 294       | 325 | 4 | 7.8  | I STEWNERQPAPALPPKPPKPTTVANNGMNNN | 76.9           | 0.6          | 76.9          | 0.7 | 76.3  | 1.4 | 75.9 | 1.0 |       |
| 294       | 326 | 4 | 8.2  | I STEWNERQPAPALPPKPPKPTTVANNGMNNM | 77.2           | 0.6          | 77.0          | 0.7 | 77.7  | 1.0 | 77.6 | 0.9 |       |
| 299       | 325 | 4 | 6.3  | NERQPAPALPPKPPKPTTVANNGMNNN       | 80.5           | 0.2          | 80.8          | 0.3 | 80.4  | 0.6 | 82.6 | 1.0 |       |
| 299       | 326 | 4 | 7.1  | NERQPAPALPPKPPKPTTVANNGMNNM       | 79.3           | 1.3          | 78.9          | 0.7 | 79.3  | 2.0 | 80.9 | 0.0 |       |
| 329       | 333 | 1 | 9.0  | QDAEW                             | 30.9           | 0.8          | 47.9          | 0.4 | 35.7  | 1.5 | 58.8 | 1.9 |       |
| 333       | 341 | 2 | 12.1 | WYWGDISRE                         | 38.8           | 0.8          | 56.7          | 0.1 | 33.5  | 1.0 | 59.8 | 0.2 |       |
| 334       | 341 | 2 | 9.4  | YVWGDISRE                         | 47.2           | 0.9          | 66.6          | 0.1 | 41.2  | 0.6 | 66.4 | 0.6 |       |
| 342       | 349 | 2 | 4.6  | EVNEKLRD                          | 25.5           | 0.7          | 63.7          | 0.3 | 29.4  | 3.9 | 67.2 | 1.2 |       |
| 342       | 355 | 3 | 7.9  | EVNEKLRDADGTF                     | 20.1           | 0.0          | 43.2          | 0.5 | 18.9  | 0.5 | 52.9 | 0.8 |       |
| 346       | 355 | 3 | 6.7  | KLRDADGTF                         | 18.0           | 0.3          | 31.8          | 0.5 | 17.9  | 1.2 | 43.7 | 1.2 |       |
| 356       | 371 | 4 | 7.1  | LVRDASTKMHGDYTLT                  | 23.6           | 0.2          | 27.7          | 0.3 | 20.3  | 0.4 | 35.9 | 0.7 |       |
| 356       | 372 | 4 | 9.4  | LVRDASTKMHGDYTLTL                 | 19.1           | 0.5          | 22.9          | 0.4 | 16.2  | 0.3 | 30.9 | 1.3 |       |
| 372       | 380 | 3 | 3.5  | LRKGGNNKL                         | 21.6           | 0.6          | 43.9          | 0.3 | 31.4  | 0.2 | 49.6 | 0.6 |       |
| 373       | 380 | 2 | 3.1  | RKGGNNKL                          | 22.4           | 0.8          | 41.9          | 1.0 | 32.3  | 0.6 | 47.9 | 0.5 |       |
| 381       | 398 | 4 | 11.0 | IKIFHRDGKYGFSPLTF                 | 21.8           | 0.4          | 29.3          | 0.2 | 22.5  | 0.3 | 32.0 | 0.4 |       |
| 381       | 401 | 4 | 10.9 | IKIFHRDGKYGFSPLTFSSV              | 25.1           | 0.7          | 33.3          | 0.1 | 25.6  | 0.4 | 35.7 | 0.6 |       |
| 402       | 413 | 3 | 8.6  | VELINHYRNESL                      | 26.2           | 0.2          | 27.4          | 0.0 | 23.7  | 0.3 | 28.6 | 0.2 |       |
| 405       | 413 | 3 | 6.0  | INHYRNESL                         | 36.8           | 0.2          | 38.8          | 0.0 | 33.5  | 0.6 | 39.8 | 0.4 |       |
| 414       | 420 | 1 | 7.1  | AQYNPKL                           | 85.4           | 0.2          | 86.3          | 0.6 | 80.0  | 0.7 | 85.8 | 0.9 |       |
| 414       | 420 | 2 | 7.1  | AQYNPKL                           | 87.0           | 0.3          | 89.9          | 0.2 | 80.4  | 1.1 | 88.3 | 0.4 |       |
| 421       | 437 | 3 | 0.0  | DVKLLYPVSKYQQEIQM                 |                |              |               |     | 48.1  | 0.5 | 66.8 | 0.2 |       |
| 480       | 487 | 2 | 8.0  | KRTAIEAF                          | 3.1            | 0.8          | 5.9           | 0.5 | 25.1  | 0.8 | 65.0 | 0.3 |       |
| 508       | 520 | 4 | 4.8  | YIEKFKREGNEKE                     | 47.6           | 0.9          | 53.9          | 1.0 | 48.0  | 0.9 | 54.1 | 0.8 |       |
| 522       | 538 | 4 | 7.0  | QRIMHNYDKLSRISEI                  | 5.2            | 0.1          | 30.4          | 0.3 | 7.9   | 0.5 | 29.4 | 2.1 |       |
| 538       | 549 | 4 | 8.1  | IIDSRRLLEEDL                      | 1.1            | 0.2          | 20.5          | 0.4 | 10.4  | 0.9 | 51.3 | 0.5 |       |
| 556       | 570 | 4 | 7.8  | YREIDKRMNSIKPDL                   | 3.4            | 0.1          | 17.0          | 0.4 | 59.5  | 1.1 | 59.4 | 0.3 |       |
| 557       | 570 | 3 | 7.3  | REIDKRMNSIKPDL                    | 3.8            | 0.2          | 18.3          | 0.5 | 60.9  | 1.1 | 62.2 | 0.2 |       |
| 571       | 581 | 4 | 7.2  | IQLRKTRDQYL                       | 1.4            | 0.2          | 18.2          | 0.2 | 55.2  | 0.5 | 56.2 | 0.9 |       |
| 582       | 596 | 3 | 7.1  | MWLTQKQVGRQKRLNE                  | 40.3           | 0.6          | 58.6          | 0.4 | 66.7  | 0.7 | 66.8 | 0.2 |       |
| 582       | 596 | 5 | 7.2  | MWLTQKQVGRQKRLNE                  | 36.5           | 0.3          | 54.4          | 0.7 | 64.1  | 0.7 | 64.6 | 0.8 |       |
| 610       | 637 | 4 | 7.4  | VEDDEDLPHHDEKTWNVGSNRNKAENL       | 21.6           | 0.1          | 30.2          | 0.2 | 23.4  | 1.0 | 37.1 | 0.0 |       |
| 638       | 646 | 3 | 4.5  | LRGKRDGTF                         | 17.7           | 0.4          | 25.4          | 0.7 | 19.2  | 1.1 | 36.0 | 0.9 |       |
| 647       | 656 | 3 | 3.6  | LVRESSKQGC                        | 53.5           | 0.7          | 60.4          | 0.1 | 54.8  | 1.1 | 65.2 | 0.3 |       |
| 647       | 657 | 3 | 5.1  | LVRESSKQGCY                       | 44.5           | 0.7          | 54.9          | 0.2 | 45.4  | 0.4 | 56.5 | 0.7 |       |
| 661       | 680 | 4 | 7.4  | VVVDGEVKHCVINKTATGYG              | 26.0           | 0.2          | 37.4          | 0.3 | 28.7  | 1.4 | 50.4 | 0.2 |       |
| 661       | 687 | 4 | 10.4 | VVVDGEVKHCVINKTATGYGFAEYPYNL      | 21.1           | 0.5          | 39.6          | 0.1 | 30.5  | 0.5 | 50.3 | 0.1 |       |
| 681       | 687 | 2 | 10.7 | FAEYPYNL                          | 29.1           | 0.8          | 67.9          | 0.1 | 63.3  | 1.6 | 76.0 | 0.3 |       |
| 694       | 703 | 3 | 8.5  | LVLHYQHTSL                        | 4.9            | 0.1          | 10.6          | 0.3 | 9.8   | 1.0 | 26.9 | 0.3 |       |
| 697       | 703 | 2 | 5.1  | HYQHTSL                           | 8.6            | 0.4          | 18.2          | 0.4 | 15.5  | 0.6 | 33.4 | 0.1 |       |
| 704       | 710 | 2 | 5.1  | VQHNDL                            | 23.4           | 0.3          | 36.1          | 0.1 | 25.1  | 0.7 | 35.5 | 0.2 |       |
| 711       | 719 | 2 | 11.0 | NVTLAYPVY                         | 3.9            | 0.3          | 17.6          | 0.2 | 6.3   | 1.5 | 50.9 | 0.5 |       |
| 711       | 724 | 3 | 8.7  | NVTLAYPVYAQQRR                    | 33.8           | 0.1          | 46.7          | 0.2 | 35.9  | 2.4 | 65.6 | 0.9 |       |

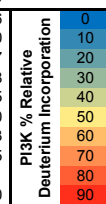

Fig. S4 All HDX peptide data for experiments examining conformational changes in APDS2 mutation (labelled as p85 deletion) for both p110δ and p85α (cont).

| p110 $\alpha$ |     |   |      | >30%<br>15-30%                  | 8-15%<br><8% | PI3K WT |       |     |      | PI3K deletion |       |     |    | PI3K % Relative<br>Deuterium Incorporation |
|---------------|-----|---|------|---------------------------------|--------------|---------|-------|-----|------|---------------|-------|-----|----|--------------------------------------------|
| S             | E   | Z | RT   | Sequence                        | 3.0          | SD      | 300.0 | SD  | 3.0  | SD            | 300.0 | SD  |    |                                            |
| 11            | 20  | 3 | 11.7 | WGIHLMPPRI                      | 37.6         | 0.2     | 56.2  | 0.3 | 41.9 | 0.4           | 61.4  | 0.9 | 0  |                                            |
| 11            | 23  | 3 | 12.4 | WGIHLMPPRILVE                   | 27.1         | 0.1     | 46.9  | 0.6 | 30.0 | 0.2           | 49.2  | 0.5 | 10 |                                            |
| 24            | 30  | 2 | 10.9 | CLLPNGM                         | 1.8          | 0.2     | 18.0  | 0.2 | 3.7  | 0.7           | 24.0  | 0.5 | 20 |                                            |
| 37            | 42  | 2 | 7.2  | LREATL                          | 0.7          | 0.3     | 15.6  | 0.1 | 1.8  | 0.4           | 24.3  | 0.1 | 30 |                                            |
| 43            | 62  | 5 | 9.4  | ITIKHELFKEARKYPLHQLL            | 8.0          | 0.2     | 26.7  | 0.1 | 8.6  | 0.6           | 25.9  | 0.4 | 40 |                                            |
| 50            | 64  | 4 | 8.5  | FKEARKYPLHQLLQD                 | 17.3         | 0.0     | 42.5  | 0.3 | 20.3 | 2.3           | 42.6  | 0.4 | 50 |                                            |
| 71            | 76  | 1 | 5.4  | VSVTQE                          | 7.1          | 0.4     | 29.3  | 0.4 | 15.3 | 0.7           | 39.9  | 0.4 | 60 |                                            |
| 77            | 82  | 2 | 7.1  | AEREFF                          | 11.9         | 0.3     | 32.1  | 0.7 | 16.5 | 1.2           | 34.3  | 1.5 | 70 |                                            |
| 83            | 91  | 3 | 7.1  | FDETRRLCD                       | 3.3          | 0.1     | 14.2  | 0.9 | 4.3  | 0.2           | 20.2  | 0.5 | 80 |                                            |
| 83            | 92  | 3 | 10.0 | FDETRRLCDL                      | 1.7          | 0.1     | 11.0  | 0.4 | 2.5  | 0.2           | 18.8  | 0.2 | 90 |                                            |
| 92            | 99  | 2 | 14.0 | LRLFQPF                         | 1.0          | 0.1     | 5.3   | 0.4 | 2.5  | 0.2           | 13.3  | 0.1 |    |                                            |
| 93            | 99  | 2 | 12.8 | RLFQPF                          | 0.9          | 0.1     | 1.5   | 0.4 | 2.9  | 0.5           | 4.0   | 0.3 |    |                                            |
| 100           | 116 | 4 | 6.9  | KVIEPVGNREEKILNRE               | 30.4         | 0.1     | 57.5  | 0.7 | 51.7 | 0.4           | 61.2  | 0.8 |    |                                            |
| 100           | 119 | 4 | 9.8  | KVIEPVGNREEKILNREIGF            | 20.3         | 0.9     | 47.3  | 0.4 | 46.0 | 0.5           | 59.5  | 0.2 |    |                                            |
| 114           | 119 | 2 | 8.8  | NREIGF                          | 9.5          | 0.3     | 22.6  | 3.2 | 39.2 | 3.4           | 70.9  | 1.9 |    |                                            |
| 120           | 127 | 1 | 9.6  | AIGMPVCE                        | 20.9         | 0.1     | 48.4  | 2.2 | 50.7 | 0.3           | 75.7  | 2.5 |    |                                            |
| 129           | 138 | 2 | 6.9  | DMVKDPEVQD                      | 30.4         | 0.3     | 49.3  | 1.4 | 45.9 | 1.2           | 55.4  | 0.5 |    |                                            |
| 131           | 138 | 2 | 5.1  | VKDPEVQD                        | 34.8         | 0.2     | 46.7  | 0.0 | 53.4 | 0.9           | 59.5  | 0.5 |    |                                            |
| 153           | 164 | 4 | 5.6  | LRDLNSPHSRAM                    | 25.8         | 0.2     | 44.4  | 2.0 | 33.5 | 0.2           | 50.0  | 1.5 |    |                                            |
| 154           | 164 | 3 | 4.6  | RDNSPHSRAM                      | 29.7         | 0.1     | 47.4  | 2.4 | 36.7 | 2.4           | 49.6  | 3.5 |    |                                            |
| 165           | 192 | 3 | 10.2 | YVYPPNVESSPELPKHYYNKLDKGQIIV    | 29.0         | 0.2     | 47.9  | 0.2 | 29.9 | 1.3           | 50.6  | 2.5 |    |                                            |
| 165           | 192 | 4 | 10.2 | YVYPPNVESSPELPKHYYNKLDKGQIIV    | 29.3         | 0.2     | 48.2  | 0.0 | 30.9 | 0.4           | 50.0  | 1.1 |    |                                            |
| 193           | 209 | 3 | 11.7 | VVWVISPNDKQKYTL                 | 29.3         | 0.1     | 43.6  | 0.8 | 32.0 | 0.7           | 44.9  | 1.2 |    |                                            |
| 196           | 209 | 3 | 8.2  | VIVSPNNDKQKYTL                  | 41.6         | 0.9     | 53.0  | 0.8 | 42.5 | 0.4           | 54.0  | 1.8 |    |                                            |
| 224           | 233 | 2 | 4.5  | AIRKKTMSL                       | 36.6         | 0.1     | 45.2  | 0.8 | 36.1 | 0.9           | 45.7  | 1.6 |    |                                            |
| 234           | 238 | 1 | 3.8  | LSSEQ                           | 71.9         | 2.3     | 72.8  | 1.0 | 70.9 | 2.7           | 72.0  | 5.0 |    |                                            |
| 261           | 269 | 2 | 9.3  | FLEKYPLSQ                       | 13.6         | 0.4     | 27.4  | 0.8 | 20.2 | 0.8           | 33.2  | 2.7 |    |                                            |
| 261           | 275 | 4 | 9.6  | FLEKYPLSQYKYIRS                 | 13.4         | 0.2     | 21.0  | 0.7 | 15.9 | 0.6           | 23.7  | 0.9 |    |                                            |
| 279           | 287 | 2 | 12.0 | LGRMPLML                        | 18.3         | 0.3     | 31.6  | 0.7 | 20.8 | 0.4           | 31.1  | 1.9 |    |                                            |
| 280           | 287 | 2 | 11.4 | GRMPLML                         | 20.5         | 0.1     | 33.2  | 0.3 | 22.0 | 0.4           | 35.3  | 0.7 |    |                                            |
| 288           | 293 | 2 | 6.2  | MAKESL                          | 44.0         | 1.8     | 72.0  | 6.0 | 49.5 | 2.1           | 75.4  | 1.0 |    |                                            |
| 294           | 301 | 2 | 10.2 | YSQLPMDC                        | 56.5         | 0.1     | 72.4  | 1.2 | 58.4 | 0.4           | 74.4  | 2.6 |    |                                            |
| 308           | 327 | 3 | 7.8  | SRRIATPYMNGETSTKSL              | 56.2         | 0.8     | 62.5  | 0.9 | 55.6 | 1.3           | 64.0  | 1.1 |    |                                            |
| 321           | 327 | 2 | 5.0  | ETSTKSL                         | 44.7         | 1.2     | 63.9  | 0.7 | 46.8 | 1.2           | 65.9  | 0.7 |    |                                            |
| 328           | 334 | 1 | 12.2 | WVINSAL                         | 39.0         | 0.4     | 50.5  | 0.2 | 38.4 | 0.5           | 51.7  | 1.0 |    |                                            |
| 335           | 342 | 2 | 8.1  | RIKILCAT                        | 2.2          | 0.4     | 24.2  | 0.1 | 2.7  | 1.0           | 26.3  | 0.2 |    |                                            |
| 343           | 350 | 2 | 7.7  | YVNVNIRD                        | 77.9         | 0.2     | 83.8  | 0.3 | 82.2 | 0.5           | 86.7  | 1.8 |    |                                            |
| 347           | 355 | 3 | 9.0  | NIRDIDKIY                       | 33.9         | 0.0     | 45.4  | 0.3 | 41.8 | 0.3           | 48.7  | 0.7 |    |                                            |
| 356           | 369 | 2 | 8.1  | VRTGIYHGGEPLCD                  | 5.9          | 0.1     | 9.5   | 0.6 | 8.8  | 1.3           | 15.5  | 2.2 |    |                                            |
| 356           | 369 | 3 | 8.1  | VRTGIYHGGEPLCD                  | 7.1          | 0.1     | 10.6  | 0.8 | 9.6  | 0.5           | 13.6  | 0.4 |    |                                            |
| 370           | 386 | 3 | 10.6 | NVNTQVRVPCSNPRWNEW              | 23.4         | 0.1     | 48.8  | 0.3 | 26.0 | 0.2           | 51.8  | 0.6 |    |                                            |
| 390           | 402 | 3 | 11.5 | DIYPDLPRAARL                    | 4.4          | 0.1     | 13.2  | 0.4 | 6.1  | 0.4           | 16.8  | 1.4 |    |                                            |
| 391           | 402 | 3 | 11.0 | IYPDLPRAARL                     | 2.9          | 0.3     | 3.8   | 0.3 | 5.0  | 0.1           | 6.8   | 0.3 |    |                                            |
| 408           | 429 | 5 | 10.6 | SVKGRKGAKKEHCPLAWGNINL          | 5.0          | 0.5     | 8.5   | 0.4 | 5.2  | 0.4           | 9.8   | 0.4 |    |                                            |
| 430           | 436 | 1 | 10.9 | FDYTDL                          | 4.3          | 0.5     | 25.9  | 0.3 | 7.4  | 0.6           | 33.0  | 1.0 |    |                                            |
| 437           | 443 | 2 | 7.8  | VSGKML                          | 34.5         | 0.2     | 44.3  | 0.8 | 36.4 | 1.2           | 46.7  | 0.8 |    |                                            |
| 444           | 455 | 2 | 13.1 | NLWVPVPHGLEDL                   | 23.9         | 0.3     | 46.0  | 0.1 | 41.6 | 0.4           | 45.4  | 0.1 |    |                                            |
| 444           | 473 | 3 | 14.0 | NLWVPVPHGLEDLLNPIGVTGSPNPKETPCL | 16.3         | 0.1     | 45.1  | 0.3 | 26.3 | 0.5           | 49.3  | 0.2 |    |                                            |
| 455           | 473 | 3 | 10.8 | LLNPIGVTGSPNPKETPCL             | 18.0         | 0.1     | 51.8  | 0.3 | 22.9 | 0.8           | 55.6  | 0.2 |    |                                            |
| 456           | 474 | 2 | 9.4  | LNPIGVTGSPNPKETPCL              | 18.4         | 0.2     | 54.2  | 0.5 | 24.3 | 0.7           | 57.0  | 0.7 |    |                                            |
| 483           | 491 | 2 | 10.8 | VKFPDMSV                        | 28.4         | 0.0     | 47.0  | 0.1 | 32.2 | 0.9           | 52.7  | 1.0 |    |                                            |
| 484           | 491 | 2 | 10.4 | VKFPDMSV                        | 36.0         | 0.8     | 57.6  | 0.5 | 44.9 | 0.6           | 65.6  | 0.5 |    |                                            |
| 492           | 498 | 2 | 8.3  | IEEHANW                         | 30.6         | 0.3     | 44.1  | 0.0 | 35.3 | 0.8           | 56.9  | 1.8 |    |                                            |
| 499           | 506 | 2 | 7.3  | SVSREAGF                        | 72.3         | 0.1     | 74.1  | 0.3 | 74.5 | 1.2           | 76.7  | 3.4 |    |                                            |
| 507           | 523 | 3 | 7.8  | SYSAGLSNRLARDNEL                | 44.9         | 0.6     | 45.8  | 1.4 | 45.8 | 1.0           | 45.3  | 1.0 |    |                                            |
| 523           | 533 | 4 | 4.9  | LRNDKEQLKA                      | 27.9         | 2.1     | 56.1  | 3.2 | 31.3 | 1.8           | 57.0  | 3.9 |    |                                            |
| 524           | 531 | 2 | 5.0  | RENDKEQL                        | 32.0         | 0.5     | 51.8  | 1.2 | 35.2 | 0.8           | 54.6  | 3.0 |    |                                            |
| 524           | 533 | 2 | 4.3  | RENDKEQLKA                      | 24.4         | 0.2     | 56.1  | 0.8 | 28.8 | 2.7           | 59.6  | 0.6 |    |                                            |
| 524           | 533 | 3 | 4.3  | RENDKEQLKA                      | 24.9         | 0.6     | 56.4  | 0.3 | 28.7 | 0.7           | 57.7  | 0.4 |    |                                            |
| 532           | 542 | 2 | 7.1  | KAISTRDPLSE                     | 17.7         | 0.2     | 48.0  | 0.1 | 23.6 | 2.3           | 48.5  | 0.9 |    |                                            |
| 532           | 542 | 3 | 7.1  | KAISTRDPLSE                     | 16.9         | 1.2     | 46.5  | 1.0 | 23.6 | 0.2           | 46.5  | 0.6 |    |                                            |
| 534           | 542 | 2 | 7.9  | ISTRDPLSE                       | 22.0         | 0.4     | 55.5  | 2.5 | 26.3 | 0.2           | 55.6  | 1.7 |    |                                            |
| 543           | 551 | 2 | 10.1 | ITEQEKDFL                       | 7.8          | 0.4     | 22.9  | 0.6 | 19.7 | 0.2           | 33.2  | 0.3 |    |                                            |
| 552           | 565 | 4 | 11.3 | WSHRHYCVTIPEIL                  | 2.3          | 0.2     | 23.3  | 0.5 | 5.4  | 2.9           | 26.1  | 1.9 |    |                                            |
| 552           | 570 | 4 | 13.0 | WSHRHYCVTIPEILPKLLL             | 2.8          | 0.1     | 16.4  | 0.4 | 4.0  | 0.3           | 18.3  | 0.4 |    |                                            |
| 566           | 570 | 2 | 10.2 | PKLLL                           | 1.8          | 0.5     | 2.8   | 1.1 | 4.2  | 2.5           | 7.3   | 1.7 |    |                                            |
| 571           | 583 | 3 | 8.6  | SVKWNSRDEVAQM                   | 2.0          | 0.2     | 15.5  | 0.5 | 3.3  | 0.3           | 13.6  | 0.2 |    |                                            |
| 584           | 598 | 2 | 10.6 | YCLVKDWPIKPEQA                  | 7.5          | 0.1     | 32.0  | 0.7 | 13.6 | 1.9           | 38.2  | 1.2 |    |                                            |
| 587           | 598 | 2 | 8.2  | VKDWPPIKPEQA                    | 8.9          | 0.1     | 38.6  | 0.1 | 14.0 | 2.2           | 48.4  | 3.2 |    |                                            |
| 602           | 613 | 2 | 9.8  | LDCNYPDPIMVRG                   | 4.1          | 0.1     | 23.6  | 0.1 | 6.6  | 0.5           | 29.9  | 0.7 |    |                                            |
| 619           | 632 | 3 | 11.2 | LEKYLDDKLSQYL                   | 6.7          | 0.0     | 33.1  | 0.5 | 9.1  | 1.0           | 37.1  | 1.2 |    |                                            |
| 636           | 648 | 2 | 12.3 | VQVLKYEQYLDNL                   | 7.3          | 0.1     | 18.7  | 0.1 | 9.6  | 0.2           | 21.6  | 0.8 |    |                                            |
| 649           | 666 | 5 | 10.0 | LVRFLKKALTNQRIGHF               | 1.2          | 0.4     | 2.9   | 0.3 | 2.7  | 0.7           | 4.1   | 0.7 |    |                                            |

Fig. S5. All HDX peptide data for experiments examining conformational changes in APDS2 mutation (labelled as p85 deletion) for both p110 $\alpha$  and p85 $\alpha$ . The charge state (Z), residue start, residue end number, retention time (RT) and sequence are displayed for every peptide. The two time points are labelled, and the relative level of HDX is coloured according to the amount of deuterium incorporated, on a blue to red continuum. Peptides with differences in exchange have the sequence coloured according to the legend. The data listed are the average of three independent experiments, with SD shown next to all HDX values.

| p110 $\alpha$ |      |   |      | WT                     |      |     |       | deletion |      |     |       |     |
|---------------|------|---|------|------------------------|------|-----|-------|----------|------|-----|-------|-----|
| S             | E    | Z | RT   | Sequence               | 3.0  | SD  | 300.0 | SD       | 3.0  | SD  | 300.0 | SD  |
| 653           | 666  | 3 | 7.4  | LLKKALTNQRIGHF         | 1.6  | 0.6 | 3.9   | 0.1      | 3.3  | 0.4 | 6.2   | 0.3 |
| 667           | 671  | 2 | 13.7 | FFWHL                  | 1.8  | 0.1 | 3.1   | 0.7      | 3.0  | 0.3 | 6.4   | 0.1 |
| 672           | 687  | 4 | 9.2  | KSEMHNKTVSQRFGLL       | 6.7  | 0.3 | 24.6  | 0.6      | 10.1 | 0.8 | 27.6  | 0.6 |
| 691           | 697  | 2 | 7.1  | YCRACGM                | 28.2 | 0.1 | 34.3  | 0.0      | 31.3 | 0.1 | 41.3  | 1.1 |
| 698           | 709  | 3 | 6.8  | YLKHLNRQVEAM           | 2.4  | 0.3 | 5.0   | 0.1      | 4.2  | 0.4 | 13.3  | 1.2 |
| 713           | 734  | 5 | 10.7 | INLTDILKQEKKDETQKVQMKF | 47.3 | 0.1 | 60.0  | 0.7      | 49.4 | 0.2 | 65.9  | 3.3 |
| 720           | 734  | 5 | 6.7  | KQEKKDETQKVQMKF        | 48.7 | 0.9 | 51.3  | 0.8      | 49.0 | 1.0 | 51.0  | 0.8 |
| 735           | 744  | 3 | 8.7  | LVEQMRPDF              | 18.8 | 0.5 | 68.7  | 0.7      | 35.6 | 1.5 | 72.3  | 2.1 |
| 745           | 764  | 3 | 14.1 | MDALQGFLSPLNPAHQLGNL   | 2.0  | 0.1 | 11.7  | 1.0      | 5.0  | 1.6 | 14.2  | 1.7 |
| 745           | 766  | 3 | 14.0 | MDALQGFLSPLNPAHQLGNLRL | 7.3  | 0.2 | 16.0  | 0.0      | 8.9  | 0.8 | 16.8  | 0.9 |
| 746           | 764  | 2 | 13.7 | DALQGFLSPLNPAHQLGNL    | 2.8  | 0.1 | 12.1  | 0.3      | 4.3  | 0.5 | 14.4  | 0.2 |
| 746           | 766  | 3 | 13.7 | DALQGFLSPLNPAHQLGNLRL  | 8.1  | 0.1 | 16.5  | 0.3      | 8.8  | 0.1 | 18.4  | 0.5 |
| 751           | 764  | 2 | 11.7 | FLSPLNPAHQLGNL         | 4.4  | 0.0 | 16.7  | 0.4      | 7.3  | 0.2 | 22.3  | 1.3 |
| 751           | 766  | 3 | 12.0 | FLSPLNPAHQLGNLRL       | 11.3 | 0.1 | 20.9  | 0.3      | 12.8 | 0.3 | 24.2  | 1.2 |
| 769           | 781  | 4 | 10.4 | CRIMSSAKRPLWL          | 17.4 | 0.2 | 32.4  | 0.4      | 20.1 | 0.6 | 33.7  | 2.4 |
| 782           | 789  | 1 | 11.2 | NWENPDIM               | 33.7 | 0.2 | 61.1  | 0.3      | 36.1 | 0.9 | 64.0  | 0.2 |
| 799           | 807  | 2 | 9.6  | IIFKNGDDL              | 19.8 | 0.2 | 29.9  | 0.5      | 24.2 | 1.9 | 35.1  | 1.6 |
| 799           | 811  | 3 | 9.5  | IIFKNGDDLQDQM          | 11.7 | 0.1 | 30.5  | 2.5      | 14.6 | 0.6 | 28.4  | 1.3 |
| 815           | 821  | 2 | 9.6  | QIIRIME                | -1.4 | 0.0 | -0.5  | 0.3      | 2.4  | 0.3 | 6.0   | 0.0 |
| 816           | 821  | 2 | 9.2  | IIRIME                 | -0.5 | 0.3 | -0.6  | 0.3      | 2.8  | 2.4 | 4.8   | 1.7 |
| 822           | 830  | 1 | 10.7 | NIWQNGQLD              | 16.1 | 0.1 | 36.7  | 1.2      | 22.5 | 1.7 | 42.1  | 2.9 |
| 822           | 831  | 2 | 12.7 | NIWQNGQLDL             | 11.8 | 0.1 | 31.3  | 0.6      | 14.1 | 0.2 | 32.3  | 0.6 |
| 831           | 839  | 2 | 12.5 | LRMLPYGCL              | 3.7  | 0.1 | 17.1  | 0.5      | 6.0  | 0.0 | 21.0  | 0.5 |
| 832           | 839  | 2 | 11.5 | RMLPYGCL               | 4.9  | 0.4 | 21.3  | 0.1      | 7.1  | 0.8 | 26.4  | 1.4 |
| 850           | 858  | 3 | 5.9  | VVRNSHTIM              | 14.6 | 0.7 | 26.1  | 0.4      | 17.8 | 0.6 | 39.1  | 1.1 |
| 859           | 872  | 3 | 10.1 | QIQCKGGLK GALQF        | 62.3 | 0.1 | 69.0  | 0.0      | 59.5 | 1.9 | 68.9  | 1.4 |
| 873           | 879  | 2 | 3.7  | NSHTLHQ                | 11.1 | 0.5 | 37.3  | 0.4      | 12.9 | 2.5 | 35.1  | 1.3 |
| 880           | 893  | 4 | 7.8  | WLKDKNKGEIYDAA         | 24.1 | 0.4 | 36.2  | 0.9      | 24.2 | 0.2 | 39.9  | 1.1 |
| 904           | 908  | 1 | 6.7  | YCVAT                  | -2.2 | 0.1 | -0.8  | 0.6      | -0.7 | 0.9 | 5.9   | 1.5 |
| 909           | 920  | 3 | 9.5  | FILGIGDRHNSN           | 7.4  | 0.3 | 16.9  | 0.8      | 10.5 | 0.5 | 22.9  | 1.4 |
| 909           | 921  | 3 | 10.4 | FILGIGDRHNSNI          | 4.5  | 0.1 | 12.5  | 0.7      | 6.1  | 0.9 | 15.0  | 0.4 |
| 922           | 929  | 2 | 6.7  | MVKDDGQL               | 2.8  | 0.7 | 10.5  | 1.0      | 4.5  | 0.3 | 12.9  | 0.9 |
| 930           | 934  | 2 | 11.7 | FHIDF                  | 4.3  | 0.4 | 24.3  | 1.3      | 7.7  | 0.9 | 29.5  | 3.2 |
| 930           | 937  | 3 | 12.0 | FHIDFGHF               | 7.2  | 0.3 | 28.4  | 0.7      | 13.2 | 0.7 | 28.9  | 0.8 |
| 961           | 976  | 4 | 7.0  | LIVISGAQECTKTRE        | 29.4 | 0.8 | 44.0  | 0.4      | 28.6 | 2.2 | 48.9  | 1.1 |
| 962           | 970  | 2 | 5.7  | IVISGAQE               | 22.8 | 0.3 | 35.0  | 1.5      | 23.4 | 0.5 | 37.1  | 0.4 |
| 962           | 976  | 3 | 5.7  | IVISGAQECTKTRE         | 32.2 | 0.4 | 48.1  | 0.4      | 31.6 | 0.8 | 45.5  | 0.6 |
| 984           | 989  | 2 | 9.1  | CYKAYL                 | -5.1 | 1.2 | -3.3  | 1.5      | -2.3 | 1.9 | 4.3   | 2.9 |
| 985           | 989  | 2 | 8.7  | YKAYL                  | -1.8 | 0.2 | -0.2  | 1.0      | 0.6  | 2.2 | 5.5   | 2.5 |
| 990           | 997  | 2 | 5.1  | AIRQHANL               | 11.1 | 0.3 | 36.4  | 1.8      | 12.8 | 0.6 | 36.7  | 0.4 |
| 1002          | 1006 | 1 | 13.3 | FSMML                  | 2.9  | 0.5 | 24.3  | 0.2      | 6.9  | 0.5 | 36.8  | 1.6 |
| 1006          | 1013 | 1 | 10.9 | LGSMPPEL               | 26.4 | 0.4 | 51.0  | 0.6      | 38.9 | 0.5 | 64.0  | 1.4 |
| 1006          | 1015 | 2 | 9.0  | LGSMPPELQS             | 22.9 | 0.4 | 57.4  | 2.5      | 15.5 | 0.5 | 59.1  | 2.6 |
| 1039          | 1055 | 4 | 8.0  | FMKQMNDAAHHGGWTTKM     | 22.5 | 0.5 | 27.2  | 0.6      | 23.3 | 1.1 | 29.2  | 0.8 |
| 1039          | 1055 | 5 | 7.9  | FMKQMNDAAHHGGWTTKM     | 21.9 | 0.2 | 26.3  | 0.3      | 23.0 | 1.3 | 27.3  | 0.8 |
| 1040          | 1055 | 4 | 7.1  | MKQMNDAAHHGGWTTKM      | 23.9 | 0.2 | 28.3  | 0.4      | 25.6 | 0.3 | 31.6  | 1.0 |
| 1060          | 1068 | 2 | 4.0  | HTIKQHALN              | 55.2 | 0.2 | 57.4  | 1.6      | 53.2 | 1.0 | 57.2  | 1.3 |
| 1060          | 1068 | 3 | 4.0  | HTIKQHALN              | 57.1 | 0.8 | 58.5  | 0.9      | 54.0 | 0.1 | 58.0  | 1.6 |

Fig. S5 All HDX peptide data for experiments examining conformational changes in APDS2 mutation (labelled as p85 deletion) for both p110 $\alpha$  and p85 $\alpha$ . (cont).

| p85α  |     |   |                                        | >30%<br>15-30% | 8-15%<br><8% | PI3K WT |     |       |     | PI3K Deletion |     |       |     | PI3K % Relative<br>Deuterium Incorporation |
|-------|-----|---|----------------------------------------|----------------|--------------|---------|-----|-------|-----|---------------|-----|-------|-----|--------------------------------------------|
| Start | End | Z | RT Sequence                            |                |              | 3.0     | SD  | 300.0 | SD  | 3.0           | SD  | 300.0 | SD  |                                            |
| 8     | 13  | 2 | 7.56 YRALYD                            |                |              | 3.8     | 0.1 | 16.0  | 0.6 | 4.4           | 0.5 | 17.7  | 0.1 | 0                                          |
| 38    | 52  | 2 | 8.52 VALGFSDDGQEARPEE                  |                |              | 46.3    | 0.1 | 64.1  | 0.6 | 44.6          | 0.2 | 63.1  | 0.9 | 10                                         |
| 53    | 60  | 1 | 11.85 IGWLNQYN                         |                |              | 13.6    | 0.1 | 26.8  | 0.5 | 15.0          | 0.5 | 28.7  | 0.7 | 20                                         |
| 73    | 106 | 5 | 6.5 YVEYIGRKKISPPTPKPRPPRPLPVAPGSSKTEA |                |              | 55.2    | 0.0 | 59.5  | 0.0 | 55.8          | 0.4 | 60.1  | 1.0 | 30                                         |
| 77    | 106 | 5 | 5.23 IGRKKISPPTPKPRPPRPLPVAPGSSKTEA    |                |              | 64.2    | 0.1 | 64.9  | 0.6 | 64.1          | 0.1 | 65.1  | 0.7 | 40                                         |
| 77    | 107 | 5 | 5.19 IGRKKISPPTPKPRPPRPLPVAPGSSKTEAD   |                |              | 63.4    | 0.0 | 63.9  | 0.6 | 63.5          | 0.5 | 64.1  | 0.6 | 50                                         |
| 113   | 118 | 1 | 11.7 LTLPLD                            |                |              | 37.8    | 0.1 | 77.4  | 0.8 | 36.8          | 0.8 | 76.3  | 0.6 | 60                                         |
| 119   | 132 | 2 | 12.63 AEQFAPPDIAPLL                    |                |              | 18.2    | 0.2 | 38.4  | 0.5 | 18.3          | 0.3 | 38.4  | 0.4 | 70                                         |
| 139   | 146 | 3 | 4.82 IEKKGLEK                          |                |              | 28.7    | 1.5 | 62.9  | 0.7 | 31.2          | 2.4 | 64.1  | 1.7 | 80                                         |
| 149   | 158 | 2 | 6.33 LYRTQSSNL                         |                |              | 55.8    | 0.2 | 64.6  | 0.9 | 56.9          | 1.7 | 67.6  | 1.8 | 90                                         |
| 168   | 173 | 1 | 4.66 DTPSVD                            |                |              | 80.2    | 0.3 | 81.2  | 0.7 | 81.3          | 0.7 | 81.2  | 0.3 |                                            |
| 177   | 186 | 2 | 11.91 IDVHVLADAF                       |                |              | 8.6     | 0.2 | 11.9  | 0.8 | 11.5          | 0.9 | 17.2  | 2.0 |                                            |
| 186   | 202 | 3 | 11.85 FKRYLLDLPNPVIPAAY                |                |              | 12.9    | 0.2 | 18.3  | 0.1 | 12.9          | 0.1 | 18.2  | 0.3 |                                            |
| 186   | 203 | 3 | 12.32 FKRYLLDLPNPVIPAAYV               |                |              | 11.6    | 0.2 | 17.6  | 0.0 | 11.7          | 0.1 | 17.8  | 0.5 |                                            |
| 207   | 218 | 1 | 8.63 ISLAPEVQSSEE                      |                |              | 66.0    | 1.3 | 74.8  | 0.1 | 62.1          | 2.8 | 67.7  | 1.7 |                                            |
| 220   | 237 | 4 | 10.27 IQLLKKLIRSPSIPHQYW               |                |              | 4.4     | 0.1 | 18.6  | 0.1 | 7.7           | 0.4 | 23.3  | 2.2 |                                            |
| 223   | 237 | 3 | 8.68 LKLRSPSIPHQYW                     |                |              | 7.2     | 0.2 | 20.4  | 0.3 | 7.5           | 0.1 | 20.9  | 0.4 |                                            |
| 238   | 261 | 4 | 13.53 LTLQYLLKHFVKLSQTSSKNLLNA         |                |              | 11.9    | 0.2 | 21.0  | 0.2 | 11.9          | 0.1 | 21.3  | 0.1 |                                            |
| 242   | 261 | 3 | 10.27 YLLKHFVKLSQTSSKNLLNA             |                |              | 14.7    | 0.2 | 26.2  | 0.0 | 16.1          | 0.1 | 27.7  | 0.9 |                                            |
| 262   | 268 | 2 | 11.12 RVLSEIF                          |                |              | 0.1     | 0.3 | 1.4   | 0.9 | 1.8           | 0.5 | 2.3   | 1.8 |                                            |
| 262   | 272 | 2 | 13 RVLSEIFSPML                         |                |              | 0.0     | 0.1 | 9.9   | 0.2 | 2.0           | 0.4 | 13.6  | 2.3 |                                            |
| 267   | 272 | 1 | 12.42 IFSFML                           |                |              | 2.3     | 0.3 | 27.2  | 0.4 | 2.6           | 0.8 | 31.9  | 2.2 |                                            |
| 273   | 286 | 2 | 9.37 FRFSAASSDNTENL                    |                |              | 48.8    | 0.2 | 60.5  | 0.5 | 49.7          | 0.3 | 61.6  | 0.6 |                                            |
| 287   | 291 | 2 | 6.31 IKVIE                             |                |              | -3.1    | 0.6 | 0.4   | 1.5 | -1.7          | 1.0 | 2.4   | 0.9 |                                            |
| 294   | 325 | 4 | 7.78 ISTEWNERPAPALPPKPPKPTTVANNGMNNN   |                |              | 76.8    | 0.2 | 77.3  | 0.3 | 77.1          | 0.4 | 77.8  | 0.9 |                                            |
| 294   | 326 | 4 | 8.19 ISTEWNERPAPALPPKPPKPTTVANNGMNNNM  |                |              | 76.5    | 0.1 | 77.2  | 0.0 | 77.3          | 0.4 | 78.1  | 1.0 |                                            |
| 299   | 325 | 4 | 6.18 NERPAPALPPKPPKPTTVANNGMNNN        |                |              | 80.3    | 0.2 | 81.1  | 0.5 | 79.8          | 0.4 | 82.3  | 0.4 |                                            |
| 333   | 341 | 2 | 12.01 WYWGDISRE                        |                |              | 29.9    | 0.0 | 55.8  | 0.3 | 29.3          | 0.1 | 57.8  | 0.5 |                                            |
| 334   | 341 | 2 | 9.32 YWGDISRE                          |                |              | 37.3    | 0.1 | 65.9  | 1.0 | 37.8          | 0.4 | 66.5  | 1.0 |                                            |
| 342   | 349 | 2 | 4.46 EVNEKLRD                          |                |              | 14.2    | 0.4 | 49.8  | 2.3 | 22.0          | 0.3 | 59.7  | 0.6 |                                            |
| 342   | 355 | 3 | 7.88 EVNEKLRDADGTF                     |                |              | 15.2    | 0.4 | 33.4  | 0.8 | 16.7          | 0.2 | 43.7  | 0.8 |                                            |
| 356   | 371 | 4 | 6.98 LVRDASTKMHGDTLTL                  |                |              | 19.4    | 0.3 | 27.1  | 0.3 | 18.6          | 0.1 | 30.7  | 0.5 |                                            |
| 356   | 372 | 4 | 9.22 LVRDASTKMHGDTLTL                  |                |              | 15.0    | 0.1 | 21.5  | 0.3 | 15.4          | 0.1 | 26.8  | 0.1 |                                            |
| 372   | 380 | 3 | 3.33 LRKGGNNKL                         |                |              | 19.3    | 0.6 | 39.3  | 0.6 | 27.4          | 1.0 | 44.3  | 0.6 |                                            |
| 373   | 380 | 2 | 2.92 RKGNNKL                           |                |              | 20.4    | 0.5 | 37.0  | 0.7 | 27.7          | 0.7 | 43.5  | 0.6 |                                            |
| 381   | 398 | 4 | 10.8 IKIFHRDQKYGFSPLTF                 |                |              | 20.1    | 0.1 | 27.8  | 0.2 | 21.2          | 0.0 | 29.6  | 0.4 |                                            |
| 402   | 413 | 3 | 8.52 VELINHYRNESL                      |                |              | 21.1    | 0.3 | 27.1  | 0.3 | 19.8          | 0.2 | 25.1  | 0.3 |                                            |
| 405   | 413 | 3 | 5.8 INHYRNESL                          |                |              | 30.0    | 0.4 | 38.1  | 0.5 | 31.3          | 0.4 | 39.3  | 0.2 |                                            |
| 414   | 420 | 1 | 6.92 AQYNPKL                           |                |              | 72.3    | 0.7 | 86.3  | 0.0 | 75.4          | 1.3 | 86.8  | 0.5 |                                            |
| 414   | 420 | 2 | 6.92 AQYNPKL                           |                |              | 72.4    | 1.0 | 86.9  | 0.2 | 74.7          | 0.4 | 85.9  | 0.2 |                                            |
| 508   | 520 | 4 | 4.76 YIEKFKREGNEKE                     |                |              | 35.7    | 0.1 | 50.5  | 2.0 | 35.8          | 0.7 | 51.2  | 0.6 |                                            |
| 538   | 549 | 4 | 8.09 NDSRRRLEEDL                       |                |              | 0.0     | 0.5 | 10.0  | 0.1 | 3.3           | 0.1 | 32.2  | 0.5 |                                            |
| 556   | 570 | 4 | 7.67 YREIDKRMSIKPDL                    |                |              | 0.9     | 0.1 | 19.3  | 0.7 | 58.6          | 0.6 | 59.5  | 0.9 |                                            |
| 582   | 596 | 3 | 6.98 MWLTQKGVQRQKLE                    |                |              | 38.0    | 0.0 | 56.8  | 0.8 | 62.4          | 0.7 | 64.5  | 0.9 |                                            |
| 610   | 637 | 4 | 7.4 VEDDEDLPHHDEKTNVNGSSNRNKAENL       |                |              | 21.0    | 0.3 | 34.7  | 0.4 | 21.9          | 0.1 | 35.5  | 0.5 |                                            |
| 638   | 646 | 3 | 4.34 LRGKRDGTF                         |                |              | 16.1    | 0.4 | 29.3  | 1.0 | 17.7          | 0.6 | 30.6  | 0.8 |                                            |
| 647   | 656 | 3 | 3.53 LVRESSKQGC                        |                |              | 50.5    | 0.7 | 60.1  | 1.0 | 51.7          | 1.2 | 61.5  | 1.8 |                                            |
| 647   | 657 | 3 | 4.92 LVRESSKQGCY                       |                |              | 41.2    | 0.2 | 53.3  | 0.8 | 41.9          | 0.5 | 54.6  | 0.6 |                                            |
| 661   | 680 | 4 | 7.24 VVDGVEVKHCVINKTATGYG              |                |              | 24.6    | 0.2 | 45.4  | 0.8 | 25.7          | 0.5 | 46.4  | 0.6 |                                            |
| 661   | 687 | 4 | 10.43 VVDGVEVKHCVINKTATGYGFAEPYNL      |                |              | 28.1    | 0.0 | 47.4  | 0.1 | 28.5          | 0.3 | 48.3  | 0.7 |                                            |
| 681   | 687 | 2 | 10.64 FAEPYNL                          |                |              | 63.0    | 0.6 | 77.7  | 1.5 | 63.3          | 0.6 | 75.3  | 0.8 |                                            |
| 694   | 703 | 3 | 8.33 LVLHYQHTSL                        |                |              | 7.3     | 0.1 | 21.7  | 0.3 | 9.9           | 0.4 | 23.9  | 0.4 |                                            |
| 697   | 703 | 2 | 4.98 HYQHTSL                           |                |              | 12.7    | 0.2 | 30.9  | 0.3 | 14.5          | 0.3 | 31.6  | 0.3 |                                            |
| 704   | 710 | 2 | 4.94 VQHNDL                            |                |              | 21.6    | 0.0 | 33.8  | 0.3 | 24.5          | 0.8 | 36.4  | 0.6 |                                            |
| 711   | 724 | 3 | 8.48 NVTLAYPVYAQQRR                    |                |              | 31.7    | 0.0 | 57.2  | 0.1 | 37.7          | 0.9 | 60.3  | 0.5 |                                            |

Fig. S5 All HDX peptide data for experiments examining conformational changes in APDS2 mutation (labelled as p85 deletion) for both p110α and p85α. (cont).



| p110δ |    | WT Basal |      |     | WT pY |     |      | WT Membrane-pY |      |     | ESS3K Basal |     |     | ESS3K pY |      |     | ESS3K Membrane-pY |     |      |     |      |     |     |     |     |      |     |      |     |      |     |     |     |      |     |      |     |     |     |     |     |
|-------|----|----------|------|-----|-------|-----|------|----------------|------|-----|-------------|-----|-----|----------|------|-----|-------------------|-----|------|-----|------|-----|-----|-----|-----|------|-----|------|-----|------|-----|-----|-----|------|-----|------|-----|-----|-----|-----|-----|
| E     | Z  | RT       | 3    | SD  | 3     | SD  | 3    | SD             | 3    | SD  | 3           | SD  | 3   | SD       | 3    | SD  | 3                 | SD  |      |     |      |     |     |     |     |      |     |      |     |      |     |     |     |      |     |      |     |     |     |     |     |
| 12    | 18 | 2.418    | 0.57 | 1.2 | 0.83  | 0.2 | 0.85 | 1.0            | 0.45 | 0.2 | 0.60        | 0.9 | 0.8 | 0.3      | 0.70 | 2.2 | 0.64              | 0.2 | 0.87 | 0.1 | 0.85 | 0.2 | 0.9 | 0.8 | 0.3 | 0.65 | 0.5 | 0.86 | 0.5 | 0.95 | 0.8 | 0.8 | 0.5 | 0.97 | 1.8 | 0.71 | 1.1 | 0.7 | 2.2 | 0.1 | 2.1 |
| 12    | 18 | 2.418    | 0.57 | 1.2 | 0.83  | 0.2 | 0.85 | 1.0            | 0.45 | 0.2 | 0.60        | 0.9 | 0.8 | 0.3      | 0.70 | 2.2 | 0.64              | 0.2 | 0.87 | 0.1 | 0.85 | 0.2 | 0.9 | 0.8 | 0.3 | 0.65 | 0.5 | 0.86 | 0.5 | 0.95 | 0.8 | 0.8 | 0.5 | 0.97 | 1.8 | 0.71 | 1.1 | 0.7 | 2.2 | 0.1 | 2.1 |

Fig. S6 All HDX peptide data for experiments examining conformational changes, pY-activated, and membrane-bound states for both p110δ and p85α.



Table with columns for peptide IDs (S, E, Z, RT) and three conditions: E1021K Basal, E1021K pY, and E1021K Membrane + pY. Each condition has four columns representing different states (3, SD, 30, SD).

Fig. S6 All HDX peptide data for experiments examining conformational changes in APDS1 mutations under basal, pY-activated, and membrane-bound states for both p110δ and p85α.







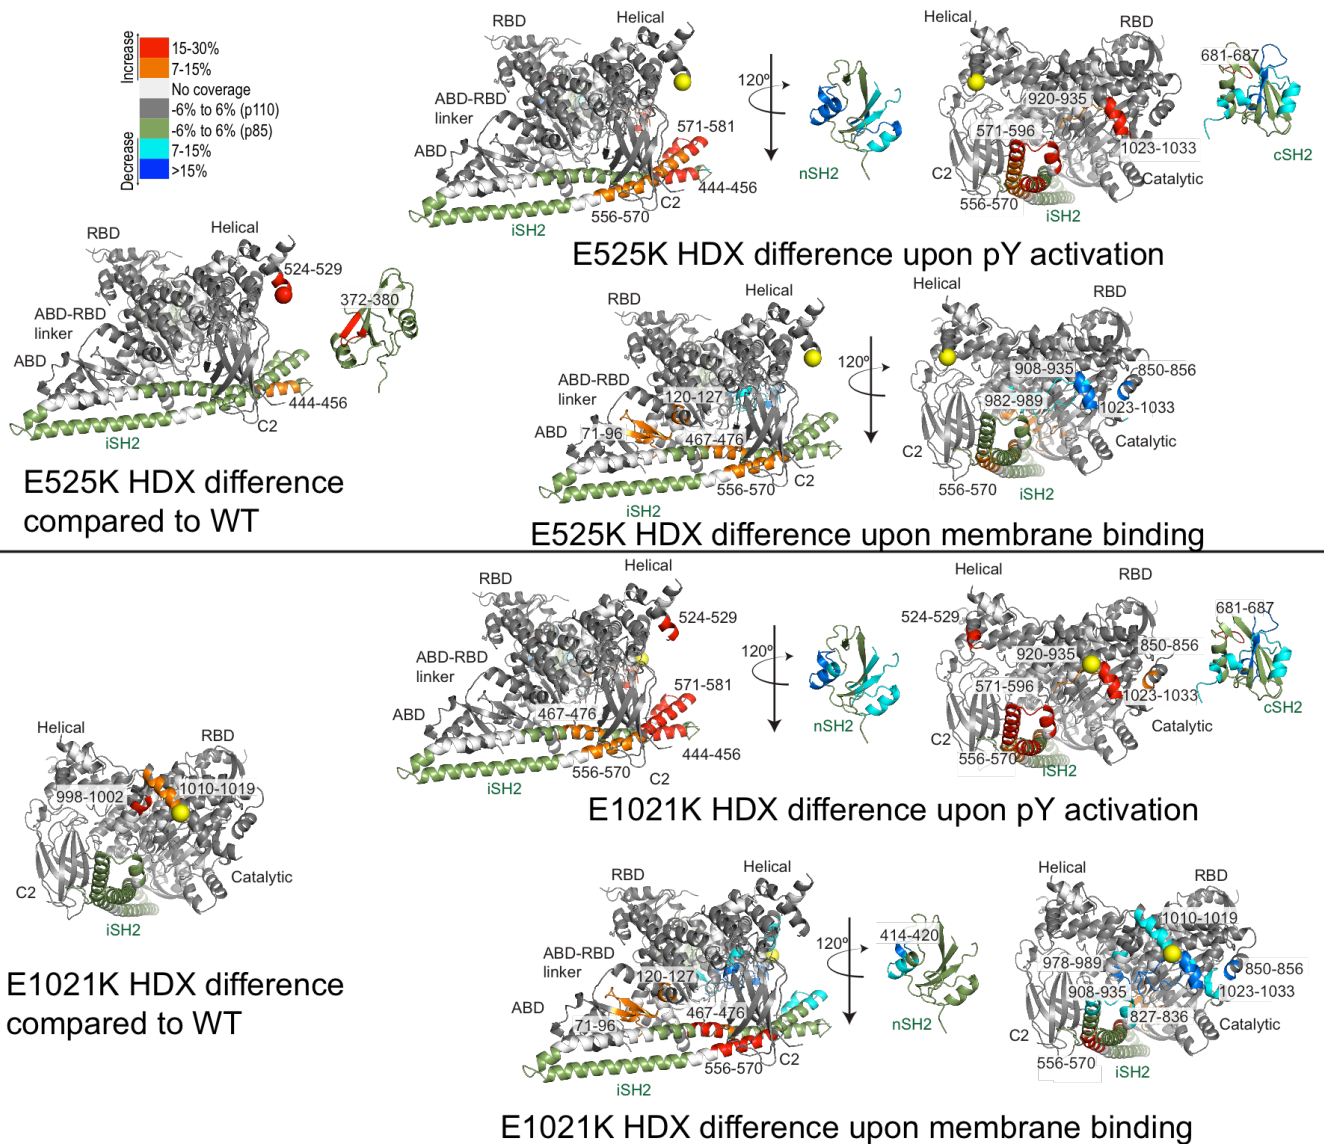

**Fig. S8 HDX differences in APDS1 mutations and under different activation states (pY-bound, and membrane-bound).** Peptides in p110 $\delta$  and the iSH2 of p85 $\alpha$  that showed differences in HDX both greater than 0.7 Da and 7% between the basal and pY-activated WT or between the pY-activated WT with and without membranes are highlighted on both the structure of p110 $\delta$ /iSH2-p85 $\alpha$  (PDB: 5DXU) according to the legend. Mutations are represented on the structure as yellow spheres.
